## **Twin Study of Early-Onset Major Depression Finds DNA Methylation Enrichment for Neurodevelopmental Genes**

Roxann Roberson-Nay<sup>1,2</sup>, Aaron R. Wolen<sup>4</sup>, Dana M. Lapato<sup>2,4</sup>, Eva E. Lancaster<sup>2,4</sup>,  
Bradley T. Webb<sup>1,2,4</sup>, Bradley Verhulst<sup>3</sup>, John M. Hettema<sup>1,2</sup>, Timothy P. York<sup>2,4</sup>

1. Virginia Commonwealth University, Department of Psychiatry, Richmond, VA.
2. Virginia Commonwealth University, Virginia Institute for Psychiatric and Behavioral Genetics, Richmond, VA.
3. Department of Psychology, Michigan State University, East Lansing, MI.
4. Virginia Commonwealth University, Department of Human and Molecular Genetics, Richmond, VA.

Correspondence: Roxann Roberson-Nay, Ph.D., Virginia Commonwealth University, Department of Psychiatry, Virginia Institute for Psychiatric and Behavioral Genetics, P.O. Box 980489, Richmond, VA 23298, Fax (804) 828-0245, email: [roxann.roberson-nay@vcuhealth.org](mailto:roxann.roberson-nay@vcuhealth.org).

## Abstract

Major depression (MD) is a debilitating mental health condition with peak prevalence occurring early in life. Genome-wide examination of DNA methylation (DNAm) offers an attractive complement to studies of allelic risk given it can reflect the combined influence of genes and environment. The current study used a co-twin control design to identify differentially and variably methylated regions of the genome that distinguish monozygotic (MZ) twins with and without a lifetime history of early-onset MD. The sample included 150 Caucasian monozygotic twins (73% female;  $M_{age}=17.52$   $SD=1.28$ ) assessed during a developmental stage characterized by relatively distinct neurophysiological changes. All twins were generally healthy and currently free of medications with psychotropic effects. DNAm was measured in peripheral blood cells using the Infinium Human BeadChip 450K Array. MD associations were detected at 760 differentially and variably methylated probes/regions that mapped to 428 genes. Results indicated an association between early-onset MD and many genes and genomic regions involved in neural circuitry formation, projection, functioning, and plasticity. Gene enrichment analyses implicated genes related to neuron structures and neurodevelopmental processes including cell-cell adhesion genes (e.g., *CDHs*, *PCDHAs*, *PCDHA1C/2C*). Genes previously implicated in mood and psychiatric disorders as well as chronic stress (e.g., *HDAC4*, *NRG1*) also were identified. DNAm regions associated with MD were found to overlap genetic loci observed in the latest Psychiatric Genomics Consortium meta-analysis of depression. Understanding the time course of epigenetic influences during emerging adulthood may clarify developmental phases where genes modulate individual differences in MD risk.

## Introduction

Major depression (MD) is highly prevalent, ranking second in the global burden of disease, with the overall lifetime risk estimated to be 16.2% in the general population<sup>1</sup>. MD is associated with increased mortality, particularly suicide<sup>1</sup>. Among adolescents, MD is associated with the greatest level of impairment of all psychiatric conditions, with 16% of females and 12% of males endorsing at least one major depressive episode (MDE) by age 18<sup>2</sup>. An early age of onset confers increased risk for negative socioemotional outcomes including recurrent MDEs<sup>3,4</sup>. Adolescence/young adulthood is characterized by neurophysiological changes (e.g., synaptic pruning, myelination) that significantly influence brain function and behavior, which may increase risk for MD and other psychiatric conditions<sup>5</sup>. Thus, understanding the genetic contributions to MD during this dynamic neurophysiological period where peak incidence is observed<sup>2,6–8</sup> is critical to elucidating developmentally informed pathways to mood disorders.

Twin and family studies robustly demonstrate that genetic factors play a role in risk for MD, with heritability estimates of roughly 35% for MD and 45% for early-onset MD<sup>9</sup>. The largest meta-analysis of molecular genetic studies of MD recently identified 44 independent loci, underscoring the centrality of genetic factors in the etiology of MD<sup>10</sup>. Twin study variance component analyses also indicate a considerable contribution of unique environmental risk factors to MD<sup>11</sup>. Due to the substantial link between environmental hardship and onset of a MDE<sup>12,13</sup>, epigenetic mechanisms may, in part, mediate the influence of environmental stress and interact with genetic liability for MD over the lifespan<sup>14–16</sup>. Epigenetic mechanisms refer to DNA, chromatin, and RNA modifications that can influence the expression of genes but do not alter the underlying genetic sequence. Animal studies have been critical to demonstrating a causal association between early life environments, epigenetic alterations, and phenotypic outcomes. For example, the seminal work of Michael Meaney and his research team demonstrates the importance of maternal care in altering the expression of genes that regulate behavioral and neuroendocrine responses to stress as well as synaptic development in the rat hippocampus<sup>17–22</sup>. Indeed, a number of animal and

human studies demonstrate lasting epigenetic alterations occurring in the genomes of cells including changes to post-mitotic neurons that integrate experience-dependent changes<sup>23</sup>. Thus, the timing of environmental stress plays an important role in subsequent epigenetic consequences, with early life stress paradigms in mice and humans demonstrating enduring changes in epigenetic profiles<sup>17,20,24–28</sup>.

A number of studies have utilized genome-wide platforms to determine DNA methylation (DNAm) differences between MD cases and controls. However, as much as 37% of methylation variance can be accounted for by genetic factors<sup>30</sup> with recent studies indicating that common genetic variation (i.e., methylation quantitative trait loci [*mQTLs*]) influence DNAm levels<sup>31–35</sup>. Most MD case-control studies of DNAm do not account for allelic variation which means genetic and environmental influences on DNAm cannot be disaggregated. In contrast, the quasi-experimental design afforded by the co-twin control approach greatly improves on the unmatched case-control design (see Supplemental Figure 1). The use of monozygotic (MZ) twins removes the impact of unmeasured confounds such as genetic variation, uterine environment, age, sex, race, cohort effects, and exposure to many shared environmental events.

The current study utilized the robust co-twin control method and a statistically powerful approach to detect differentially and variably methylated DNAm regions associated with MD in a sample of adolescent and emerging adult twins. Studying this developmental period offers a number of advantages over later life periods including fewer confounds to DNAm variability such as a history of prolonged or multiple psychiatric/medical comorbidities and medication usage as well as long-term nicotine use. Moreover, it eliminates the well-known epigenetic changes associated with aging<sup>36–38</sup>. The developmental window of young adulthood also is associated with moderate conservation of DNAm that is nonetheless responsive to environmental signals<sup>39</sup>, making it an ideal sensitive period for the study of MD.

## Methods

### Participants

One hundred sixty-six MZ twins (83 pairs) were selected from a larger sample of twins (N=430 pairs) enrolled in a study examining risk factors for internalizing disorders in a general population sample of twins (R01MH101518)<sup>40</sup>. Twins were primarily recruited through the Mid-Atlantic Twin Registry (MATR), a population-based registry<sup>40,41</sup>. All participants (parents/minor children, adults) provided written informed consent/assent.

Of the 83 twin pairs initially identified as MZ via the zygosity questionnaire, five pairs (6.3%) were determined to be DZ pairs using DNA-based markers and were removed (for zygosity determination, see Supplemental). One or both twins from three additional pairs failed DNA-based quality control checks, reducing the final analyzed sample to 75 MZ twin pairs (150 twins; see Table 1). All twins were raised together in the same home and were required to be free of psychotropic medications/medications with psychotropic effects at the time of study entry, although approximately 4.0% (n=6) endorsed a history of psychotropic medication use, slightly lower than the national average<sup>42</sup>. See full study exclusionary criteria in Supplement.

## Measures

**Major Depression.** All twin pairs completed a psychiatric history based on an expanded version of the Composite International Diagnostic Interview (CIDI)-Short Form, which queried DSM-5 MD Criterion A and C (see Supplement for questions and diagnostic algorithm)<sup>43</sup>. Current depressive symptoms also were assessed using the Short Mood and Feelings Questionnaire (SMFQ), which is a 13-item questionnaire validated to measure depressive symptoms in adolescents and adults<sup>44</sup>.

## DNA Methylation Processing

Detailed information concerning DNA extraction, methylation assessment, normalization, and quality control (QC) can be found in the Supplement.

## DNA Methylation Analysis

**Analytic Approach.** Based on observations that the average correlation between probes on the 450K microarray within approximately 250 base pairs (bp) is 0.83 and within 1 kb is 0.45<sup>45–</sup>

<sup>47</sup>, several methods have been proposed to take advantage of this structure to identify consistent DNAm change across a contiguous region<sup>45,46,48,49</sup>. Current approaches quantify regional DNAm change either as a mean difference (differentially methylated region [DMR]) or as a difference in variance (variably methylated region [VMR]). Due to the sparse and highly clustered placement of features on the Illumina 450K platform, a custom approach for defining DMRs and VMRs was developed for this study motivated by the algorithm proposed by Ong et al.<sup>45,50</sup>. They suggest both a regional and individual CpG probe approach run in tandem since approximately 25% of probes do not have a neighboring probe within 1 kb. To this end, the single-probe analysis provided the raw materials for the regional approach adopted to identify and assess significance of DMRs and VMRs. Type I error rates were estimated from empirical *P*-values for all univariate statistics (mean level and variance based tests) described below were calculated using a permutation approach. For  $k = 1,000$  reorderings, the outcome variable was resampled in a way that preserved the discordance/concordance pair status frequencies. The false discovery rate (FDR)<sup>51</sup> was estimated from the distribution of these empirical *P*-values.

## Identifying Regional DNAm Change

**Differentially Methylated Regions.** Potential DMRs were constructed using only those individual CpG probes associated with MD status resulting in a test statistic in the upper or lower 5<sup>th</sup> percentile of all probes tested. Univariate tests were performed by fitting a linear mixed-effects model<sup>52</sup> separately for each probe by regressing the normalized DNAm probe intensity on MD status while adjusting NK cell proportion and inclusion of a random effect term to account for twin pair membership. NK cell proportion was the only estimated cell type nominally significantly different between MD cases and controls ( $t = 0.266$ ,  $p = 0.051$ ), so it was included as a covariate to control for potential bias that might arise from DNAm differences due to changes in NK blood cell proportions rather than those attributable to DNAm changes associated with MD itself.

The structure of MZ twin exposure groupings provided an opportunity to focus on DNAm associations that are unique to MD versus other experimental design features. The sample used

for study was composed of three types of MZ twin pairs (i.e., discordant MD, concordant MD, concordant healthy) and resulted in number of potential statistical contrasts to be tested (Supplemental Table 1). Specific contrasts were simultaneously fit within the linear model to estimate the degree of association among two sets of comparisons: 1) the effect of interest (e.g., MD affected versus MD unaffected) and 2) extraneous associations not of interest. The latter set of contrasts, while of general interest, do not directly relate to MD and were filtered from downstream applications. For example, the comparison of DNAm levels where MD is expressed in both members (concordant MD) versus only a single member (discordant MD) may be associated with a unique DNAm profile (i.e., line 2 in Supplemental Table 1). Probes with test statistics in the 1<sup>st</sup> and 99<sup>th</sup> quantiles identified in any contrast not of interest were removed.

From the set of filtered CpG probes, a candidate DMR was defined as having at least 2 contiguous CpGs within 1 kb. The strength of a DMR association was estimated by a test statistic reflecting the area of influence approximated by the trapezoidal rule where the height ( $h$ ) was the length in base pairs between two contiguous CpGs and  $a$  and  $b$  were the univariate test statistic for the contiguous CpGs. For DMRs with more than two CpGs, the area for each contiguous pairing was summed to represent the area under the curve (AUC) for the entire DMR. All probes in the DMR had the restriction of test statistics with the same sign. A positive test statistic indicated hypermethylation in cases versus controls while a negative test statistic indicated hypomethylation.

**Variably Methylated Regions.** A similar strategy was adopted to identify variably methylated regions (VMR). In this case, the test statistic calculated was the  $F$ -value comparing the variance of two samples applied to the filtered set of CpG probes. Again, only probes for the contrast of interest were considered (10<sup>th</sup> / 90<sup>th</sup> percentiles) if they did not intersect with those from contrasts not of interest (1<sup>st</sup>/99<sup>th</sup> percentiles). VMRs were restricted to at least two contiguous probes within 1 kb whereby all probes had the restriction of either increasing or decreasing variability in cases versus controls.

**Significance Assessment of Regional Change.** The statistical significance of DMR and VMR AUC estimates were assessed using a rank-based permutation method<sup>53</sup>. This nonparametric method estimates an FDR without relying on strong assumptions about the normality of the data. The  $k = 1,000$  permutations of univariate tests were used to estimate the expected order statistics. The FDR was calculated based on the observed versus expected null scores. Briefly, for a range of thresholds, regions are called significant if the value of the observed ordered test statistic minus the mean value from the permuted rank exceeds a given threshold. The number of falsely called regions is the median number of regions that exceed the lowest AUC value of regions called significant. The FDR is calculated as the ratio of the number of falsely called regions to the number of regions called significant. An implementation of the SAM algorithm is available as a R package<sup>54</sup> but was recoded to allow for flexibility in specifying models for the twin data and to trim extreme test statistics likely to be false positives before the calculation of the FDR.

### **Functional and Regulatory Enrichment**

The distribution of significant CpG probes and regions identified to be differentially and variably methylated by MD status were examined separately across functional and regulatory annotations. CpG findings were mapped to known genes<sup>55</sup> for enrichment of Gene Ontology classifications<sup>56</sup> using clusterProfiler<sup>57</sup>. Classification functions included biological processes, cellular components, and molecular function, in addition to KEGG pathways. Tests for non-random association of CpG island features and ChromHMM chromatin states were based on the AH5086 and AH46969 tracks from the AnnotationHub package<sup>58</sup>, respectively. CpG island shores were defined as being 2 kb regions flanking CpG islands while shelves were demarcated as 2 kb upstream or downstream shore regions. A test of enrichment for each of these annotations was calculated by comparing the proportion of sequence from the intersection of significant CpG regions with the regions defined by the annotation feature. Bootstrap methods using 1,000 resamplings were used to estimate 95% confidence intervals. This observed overlap was



compared to an empirical distribution of random samples of genome groups of the same size and structure drawn from the background set under consideration. Empirical P-values were calculated from 1,000 random reorderings of the data using standard methods<sup>59</sup>.

## PGC GWAS Enrichment

A similar resampling method was performed to count the number of significant CpG regions that overlapped with the findings of a recent genome-wide association study (GWAS) meta-analysis conducted by the Psychiatric Genomics Consortium (PGC) group<sup>10</sup>. The depression phenotype in this meta-analysis was derived from a number of different methods including clinical interview, self-report, electronic medical record abstraction, and self-report of a lifetime diagnosis. This study identified 44 MD-associated loci across 18 chromosomes, which included genes enriched for targets of antidepressant medication. The non-random frequency of overlap between the significant CpG regions and the 44 independent PGC findings was assessed using bootstrap and permutation approaches from 1,000 data resamplings.

## Results

### Sample Characteristics

MZ twins meeting DSM-5 MD criteria at the probable or definite level self-reported higher depression symptom scores on the SMFQ and had higher rates of generalized anxiety disorder compared to MD unaffected twins ( $t(1,146)=6.4$ ,  $p<.001$ );  $\chi^2(1)=5.31$ ,  $p=.04$ , respectively; see Table 1). For those twins meeting DSM-5 criteria for at least one MDE, the mean age at onset was approximately 15 years, and the majority of twins (~85%) reported experiencing 3 or fewer MDEs in their lifetime. Most MD affected twins (82%) reported five or more symptoms during their worst lifetime MDE. Subject age, sex, self-reported ethnicity, and combustible cigarette use did not differ by MD status.

### Differentially Methylated Probes and Regions

From the set of 455,828 screened CpG probes, according to our definition, 50,990 background regions could be created, covering 59.9 megabases. After DMP tests, 3,995

regions consisting of 28,600 CpG probes could be considered candidate DMRs. Seventeen DMRs were identified as significantly associated with MD (all hypermethylated in MD cases) of which 15 mapped onto genes (FDR 9.9%; see Table 2). The number of CpG probes in significant DMRs ranged from 3 to 7 (median=4). Individual probe testing (DMP) resulted in 59 hypomethylated and 77 hypermethylated CpG sites with respect to MD status (FDR 1%; Supplemental Table 2). The combined set of 30.6 kb DNA sequence covered by significant DMR and DMP findings was found to have a nonrandom pattern of enrichment across ChromHMM annotations, specifically sites of strong transcription ( $p=0.019$ ), enhancers ( $p=0.045$ ), ZNF genes/repeats ( $p=0.001$ ), heterochromatin ( $p=0.013$ ) and weak repressed polycomb ( $p=0.045$ ) (Supplemental Figure 2) and CpG island relationships which included both north ( $p=0.024$ ) and south ( $p=0.003$ ) shelf regions (Supplemental Figure 3).

### **Variably Methylated Probes and Regions**

Regional analysis identified 10 variably methylated regions (VMRs) significant from a total of 11,055 candidate VMRs (FDR 17.3%). Seven of the VMRs mapped onto genes (Table 3). Significant VMRs were all more variable in MD cases, and the number of CpG probes in these regions ranged from 2 to 11 (median=4). The VMP analysis yielded 560 significant VMP findings (FDR 1%), all of which were more variable in MD cases except for a single probe (Supplemental Table 3). The combined set of VMR and VMP DNA regions of 16.6 Kb reflected a nonrandom enrichment with ChromHMM annotations for 5'/3' transcription ( $p=0.035$ ), genic enhancers ( $p=0.024$ ) and heterochromatin ( $p=0.050$ ) (Supplemental Figure 4) and CpG island relationships within the south shelf ( $p=0.029$ ) (Supplemental Figure 5).

### **Gene Enrichment Analysis**

Genes that mapped to significant differentially or variably methylated findings were combined for gene-based enrichment to provide an overview of all DNAm contributions at a functional level. The results of enrichment tests yielded significant over-representation for biological processes (BP) and cellular function (CF), and no enrichment for molecular function or KEGG, at the

10% FDR (Table 4). The BP gene category associations were hemophilic cell adhesion and cell-cell adhesion while the significant terms for CF were associated with functions of neurons, including neuron projection terminus, terminal button, axon part, cell projection part, axon, and presynapse.

## **Relationship Between Early-Onset MD DNAm Markers and PGC MD-Associated Genetic Loci**

A total of 6 differentially methylated sites (including DMP/DMRs;  $p=0.002$ ; 95% CI = 2-11) (Supplemental Table 4) and 12 variably methylated sites (including VMPs/VMRs; 95% CI = 5-19,  $p=0.008$ ) (Supplemental Table 5) overlapped PGC GWAS findings. These enrichment results were largely driven by overlap observed with the PGC GWAS locus on chromosome 6 at 27.738-32.848 Mb (Figure 1). At this locus, 5 of 6 differentially and 10 of 12 variably methylated sites overlapped.

## **Discussion**

The main objective of the current study was to identify differentially and variably methylated loci and regions that distinguish MZ twins with and without a history of early-onset MD. Across biological process (BP) and cellular function (CF) domains of the gene enrichment analysis, there was consistency in the functional attributes of the genes related to neural structures and processes as a key differentiating feature between MD affected and unaffected twins. BP gene ontologies referenced homophilic cell adhesion and cell-cell adhesion processes, which are involved in neural development and plasticity. A number of cadherins and protocadherins emerged in the cell adhesion gene sets with MD affected twins demonstrating increased variation in two cadherins (*CDH3*, *CDH6*), the clustered protocadherin alpha family (*PCHDA1* - *PCDHA13*), the C-type isoforms of PCDHA (*PCDHAC1*, *PCDHAC2*), and two non-clustered Protocadherins (*PCDH10*, *PCDH20*). CDHs/PCDHs are a group of calcium dependent cell-cell adhesion molecules that are abundantly expressed in the nervous system and play a major role in multiple steps

essential to neurodevelopment including dendrite arborization, axon outgrowth and targeting, synaptogenesis, and synapse elimination<sup>60–66</sup>.

The DNAm profile of the *PCDHs* is known to be responsive to environmental factors<sup>67</sup>, and emerging evidence suggests a role for *PCDHs* in multiple psychiatric phenotypes (e.g., schizophrenia, bipolar disorder, autism) including MD<sup>68,69</sup>. Two small twin studies observed that several cadherin/protocadherin genes demonstrated differences in DNAm between twin pairs repeatedly discordant for elevated depression symptoms<sup>70</sup> as well as a history of MD or an anxiety disorder<sup>71</sup>. A related study observed increased DNAm in *PCDH* gene families with the highest enrichment of hypermethylated sites in the *PCDHA* genes located in the hippocampus of suicide completers with a history of severe childhood abuse<sup>19</sup>. At the genetic variant level, a recent meta-analysis with over 89,000 MD cases detected a SNP (rs9540720) in the non-clustered *PCDH9* gene to be significantly associated with MD case status at the genome-wide level<sup>72</sup>, and a related gene that encodes a protein of the same family (*PCDH17*) was found to confer risk for mood disorders<sup>73</sup>. Moreover, expression patterns of *Pcdh* genes have been examined in rodent brain regions involved in the neural circuitry of MD<sup>74</sup>, with results indicating high expression levels in subregions of the hippocampus and basolateral amygdaloid complex<sup>74,75</sup>. Moreover, *Pcdh* gene expression was reduced in both structures following electroconvulsive shock (ECS), which is interesting given that ECS is an effective treatment for chronic, intractable MD symptomatology<sup>76</sup> and supports involvement of *PCDHs* in neural plasticity. The clustered *PCDHA* family also is strongly expressed in serotonergic neurons<sup>77–79</sup> and *PcdhaC2* is necessary for axonal tiling and assembly of serotonergic circuitries<sup>86</sup>. Thus, a deeper understanding of *how* the serotonergic neural network is formed in the young developing brain may be critical to identifying etiological determinants of MD and other psychiatric conditions.

The Histone Deacetylase 4 (*HDAC4*) gene was altered in MD affected twins, exhibiting increased variation and emerging as part of a genomic region displaying higher mean levels com-

pared to MD unaffected twins<sup>80</sup>. *HDAC4* is highly expressed in the human brain,<sup>81</sup> and the sub-cellular localization of the *HDAC4* protein is purportedly modulated by *N*-methyl-D-aspartate (NMDA) receptors, a specific type of ionotropic glutamate receptor important for controlling synaptic plasticity and memory function<sup>82</sup>. In humans, increased *HDAC4* expression is associated with memory deficits<sup>80,82</sup>, which is consistent with the cognitive processing difficulties observed with MD<sup>83,84</sup>. Moreover, drugs that inhibit *HDAC4* have antidepressant-like effects on behavior<sup>85–88</sup>. Similarly, Neuroregulin1 (*NRG1*) exhibited increased variation and emerged in the gene enrichment analysis as a gene involved in multiple cellular functions. *NRG1* promotes myelination in the central nervous system (CNS) and evidence suggests an association between *NRG1* and cognitive deficits linked to psychiatric disorders<sup>89,89–95</sup>.

The overlap between our DNAm results and variants identified in the latest PGC GWAS of depression were examined to better understand the possible role of early-onset MD DNAm events among these genetic associations. A total of 6 differentially methylated and 12 variably methylated sites overlapped PGC findings. These enrichment results were primarily driven by overlap observed with the PGC GWAS locus on chromosome 6, which falls in the extended MHC region. This region of the genome also was the most significant association in the PGC's GWAS of schizophrenia<sup>96</sup> and a GWAS that included a combined sample of schizophrenia and bipolar disorder cases<sup>97</sup>. The MHC is densely populated with genes related to neuronal signaling and plays a role in immune functioning. MHC findings are consistent with evidence of an immune component involved in the pathophysiology of psychiatric conditions.

A number of additional genes/gene regions previously linked to MD (e.g., *CX3CR1*, *CACNA1A*, *CDC42BPB*)<sup>99,102–104</sup>. For example, serotonin related genes, *HTR5A* and *HTR5A-AS1*, exhibited greater variance in MD affected twins. This gene is a member of the 5HT (serotonin) receptor family, which has been implicated in MD and other psychiatric conditions<sup>105–107</sup>. Related, corticotropin releasing hormone receptor 2 (*CRHR2*) and cholinergic receptor nicotinic beta 2 subunit (*CHRNA2*) demonstrated increased variance in MD affected twins. Thus, complex genetic

disorders such as MD reflect a large number of independent genetic factors that each contribute a small amount of variance to disease susceptibility and multiple psychiatric diseases likely share genetic risk factors.

Limitations associated with the current study design include its reliance on an all Caucasian sample, which diminishes generalizability of findings to other races. The current study also relied on peripheral blood tissue for DNAm. Although brain tissue is preferred to study the pathophysiology of MD, evidence suggests moderate consistency in DNAm between blood and brain tissues<sup>15,71</sup>. Consistent with epidemiological findings<sup>108</sup>, females represented the majority of the sample. Thus, increased numbers of males are needed to determine potential sex-related differences. The cross-sectional design of the current study also does not allow for determination of epigenetic differences as cause or consequence of MD onset. Strengths of the current study design include its use of the MZ co-twin control method in conjunction with a sensitive developmental window to reveal genome-wide DNAm biomarkers associated with early-onset MD.

## References

1. Kessler RC, Berglund P, Demler O, et al. The epidemiology of major depressive disorder: results from the National Comorbidity Survey Replication (NCS-R). *JAMA*. 2003;289(23):3095-3105. doi:10.1001/jama.289.23.3095
2. Weissman MM, Wolk S, Goldstein RB, et al. Depressed adolescents grown up. *JAMA*. 1999;281(18):1707-1713.
3. Lewinsohn PM, Rohde P, Seeley JR. Major depressive disorder in older adolescents: prevalence, risk factors, and clinical implications. *Clin Psychol Rev*. 1998;18(7):765-794.
4. Saluja G, Iachan R, Scheidt PC, Overpeck MD, Sun W, Giedd JN. Prevalence of and risk factors for depressive symptoms among young adolescents. *Arch Pediatr Adolesc Med*. 2004;158(8):760-765. doi:10.1001/archpedi.158.8.760
5. Kerestes R, Davey CG, Stephanou K, Whittle S, Harrison BJ. Functional brain imaging studies of youth depression: a systematic review. *Neuroimage Clin*. 2014;4:209-231. doi:10.1016/j.nicl.2013.11.009
6. Hankin BL, Abramson LY, Moffitt TE, Silva PA, McGee R, Angell KE. Development of depression from preadolescence to young adulthood: emerging gender differences in a 10-year longitudinal study. *J Abnorm Psychol*. 1998;107(1):128-140.
7. Weissman MM, Wolk S, Wickramaratne P, et al. Children with prepubertal-onset major depressive disorder and anxiety grown up. *Arch Gen Psychiatry*. 1999;56(9):794-801.
8. Costello EJ, Mustillo S, Erkanli A, Keeler G, Angold A. Prevalence and development of psychiatric disorders in childhood and adolescence. *Arch Gen Psychiatry*. 2003;60(8):837-844. doi:10.1001/archpsyc.60.8.837
9. Sullivan PF, Neale MC, Kendler KS. Genetic epidemiology of major depression: review and meta-analysis. *Am J Psychiatry*. 2000;157(10):1552-1562. doi:10.1176/appi.ajp.157.10.1552
10. Wray NR, Sullivan PF. Genome-wide association analyses identify 44 risk variants and refine the genetic architecture of major depression. July 2017. doi:10.1101/167577
11. Sullivan PF, Neale MC, Kendler KS. Genetic epidemiology of major depression: review and meta-analysis. *Am J Psychiatry*. 2000;157(10):1552-1562. doi:10.1176/appi.ajp.157.10.1552
12. Kendler KS, Kessler RC, Walters EE, et al. Stressful life events, genetic liability, and onset of an episode of major depression in women. *Am J Psychiatry*. 1995;152(6):833-842. doi:10.1176/ajp.152.6.833
13. Kessler RC. The effects of stressful life events on depression. *Annu Rev Psychol*. 1997;48:191-214. doi:10.1146/annurev.psych.48.1.191

14. Klengel T, Pape J, Binder EB, Mehta D. The role of DNA methylation in stress-related psychiatric disorders. *Neuropharmacology*. 2014;80:115-132. doi:10.1016/j.neuropharm.2014.01.013
15. Bagot RC, Labonte B, Pena CJ, Nestler EJ. Epigenetic signaling in psychiatric disorders: stress and depression. *Dialogues Clin Neurosci*. 2014;16(3):281-295.
16. Szyf M, McGowan P, Meaney MJ. The social environment and the epigenome. *Environ Mol Mutagen*. 2008;49(1):46-60. doi:10.1002/em.20357
17. Weaver ICG, Cervoni N, Champagne FA, et al. Epigenetic programming by maternal behavior. *Nat Neurosci*. 2004;7(8):847-854. doi:10.1038/nn1276
18. Weaver ICG, Szyf M, Meaney MJ. From maternal care to gene expression: DNA methylation and the maternal programming of stress responses. *Endocr Res*. 2002;28(4):699.
19. Suderman M, McGowan PO, Sasaki A, et al. Conserved epigenetic sensitivity to early life experience in the rat and human hippocampus. *Proc Natl Acad Sci U S A*. 2012;109 Suppl 2:17266-17272. doi:10.1073/pnas.1121260109
20. Fish EW, Shahrokh D, Bagot R, et al. Epigenetic programming of stress responses through variations in maternal care. *Ann N Y Acad Sci*. 2004;1036:167-180. doi:10.1196/annals.1330.011
21. Meaney MJ, Szyf M, Seckl JR. Epigenetic mechanisms of perinatal programming of hypothalamic-pituitary-adrenal function and health. *Trends Mol Med*. 2007;13(7):269-277. doi:10.1016/j.molmed.2007.05.003
22. McGowan PO, Suderman M, Sasaki A, et al. Broad epigenetic signature of maternal care in the brain of adult rats. *PLoS One*. 2011;6(2):e14739. doi:10.1371/journal.pone.0014739
23. Borrelli E, Nestler EJ, Allis CD, Sassone-Corsi P. Decoding the epigenetic language of neuronal plasticity. *Neuron*. 2008;60(6):961-974. doi:10.1016/j.neuron.2008.10.012
24. Anacker C, O'Donnell KJ, Meaney MJ. Early life adversity and the epigenetic programming of hypothalamic-pituitary-adrenal function. *Dialogues Clin Neurosci*. 2014;16(3):321-333.
25. McGowan PO, Sasaki A, D'Alessio AC, et al. Epigenetic regulation of the glucocorticoid receptor in human brain associates with childhood abuse. *Nat Neurosci*. 2009;12(3):342-348. doi:10.1038/nn.2270
26. Szyf M, Weaver I, Meaney M. Maternal care, the epigenome and phenotypic differences in behavior. *Reprod Toxicol*. 2007;24(1):9-19. doi:10.1016/j.reprotox.2007.05.001
27. Zhang TY, Labonte B, Wen XL, Turecki G, Meaney MJ. Epigenetic mechanisms for the early environmental regulation of hippocampal glucocorticoid receptor gene expression in rodents and humans. *Neuropsychopharmacology*. 2013;38(1):111-123. doi:10.1038/npp.2012.149



28. Szyf M. The early life environment and the epigenome. *Biochim Biophys Acta*. 2009;1790(9):878-885. doi:10.1016/j.bbagen.2009.01.009
29. Lappalainen T, Grealis JM. Associating cellular epigenetic models with human phenotypes. *Nat Rev Genet*. 2017;18(7):441-451. doi:10.1038/nrg.2017.32
30. Grundberg E, Meduri E, Sandling JK, et al. Global Analysis of DNA Methylation Variation in Adipose Tissue from Twins Reveals Links to Disease-Associated Variants in Distal Regulatory Elements. *The American Journal of Human Genetics*. 2013;93(5):876-890. doi:10.1016/j.ajhg.2013.10.004
31. Bell JT, Pai AA, Pickrell JK, et al. DNA methylation patterns associate with genetic and gene expression variation in HapMap cell lines. *Genome Biol*. 2011;12(1):R10. doi:10.1186/gb-2011-12-1-r10
32. Chen L, Ge B, Casale FP, et al. Genetic Drivers of Epigenetic and Transcriptional Variation in Human Immune Cells. *Cell*. 2016;167(5):1398-1414.e24. doi:10.1016/j.cell.2016.10.026
33. Banovich NE, Lan X, McVicker G, et al. Methylation QTLs are associated with coordinated changes in transcription factor binding, histone modifications, and gene expression levels. *PLoS Genet*. 2014;10(9):e1004663. doi:10.1371/journal.pgen.1004663
34. Zhang D, Cheng L, Badner JA, et al. Genetic control of individual differences in gene-specific methylation in human brain. *Am J Hum Genet*. 2010;86(3):411-419. doi:10.1016/j.ajhg.2010.02.005
35. Oh G, Wang S-C, Pal M, et al. DNA modification study of major depressive disorder: beyond locus-by-locus comparisons. *Biol Psychiatry*. 2015;77(3):246-255. doi:10.1016/j.biopsych.2014.06.016
36. Zeng Q, Chen X, Ning C, et al. Methylation of the genes ROD1, NLRC5, and HKR1 is associated with aging in Hainan centenarians. *BMC Med Genomics*. 2018;11(1):7. doi:10.1186/s12920-018-0334-1
37. Unnikrishnan A, Hadad N, Masser DR, Jackson J, Freeman WM, Richardson A. Revisiting the genomic hypomethylation hypothesis of aging. *Ann N Y Acad Sci*. 2018;1418(1):69-79. doi:10.1111/nyas.13533
38. Masser DR, Hadad N, Porter H, et al. Analysis of DNA modifications in aging research. *Geroscience*. 2018;40(1):11-29. doi:10.1007/s11357-018-0005-3
39. Levesque ML, Casey KF, Szyf M, et al. Genome-wide DNA methylation variability in adolescent monozygotic twins followed since birth. *Epigenetics*. 2014;9(10):1410-1421. doi:10.4161/15592294.2014.970060
40. Cecilione JL, Rappaport LM, Hahn SE, et al. Genetic and Environmental Contributions of Negative Valence Systems to Internalizing Pathways. *Twin Res Hum Genet*. 2018;21(1):12-23. doi:10.1017/thg.2017.72

41. Lilley ECH, Silberg JL. The Mid-Atlantic Twin Registry, revisited. *Twin Res Hum Genet.* 2013;16(1):424-428. doi:10.1017/thg.2012.125
42. Bachmann CJ, Aagaard L, Burcu M, et al. Trends and patterns of antidepressant use in children and adolescents from five western countries, 2005-2012. *Eur Neuropsychopharmacol.* 2016;26(3):411-419. doi:10.1016/j.euroneuro.2016.02.001
43. Kessler RC, Ustun TB. The World Mental Health (WMH) Survey Initiative Version of the World Health Organization (WHO) Composite International Diagnostic Interview (CIDI). *Int J Methods Psychiatr Res.* 2004;13(2):93-121.
44. Daviss WB, Birmaher B, Melhem NA, Axelson DA, Michaels SM, Brent DA. Criterion validity of the Mood and Feelings Questionnaire for depressive episodes in clinic and non-clinic subjects. *J Child Psychol Psychiatry.* 2006;47(9):927-934. doi:10.1111/j.1469-7610.2006.01646.x
45. Ong M-L, Holbrook JD. Novel region discovery method for Infinium 450K DNA methylation data reveals changes associated with aging in muscle and neuronal pathways. *Aging Cell.* 2014;13(1):142-155. doi:10.1111/accel.12159
46. Jaffe AE, Murakami P, Lee H, et al. Bump hunting to identify differentially methylated regions in epigenetic epidemiology studies. *Int J Epidemiol.* 2012;41(1):200-209. doi:10.1093/ije/dyr238
47. Lee H, Jaffe AE, Feinberg JL, et al. DNA methylation shows genome-wide association of NFIX, RAPGEF2 and MSRB3 with gestational age at birth. *Int J Epidemiol.* 2012;41(1):188-199. doi:10.1093/ije/dyr237
48. Jaffe AE, Feinberg AP, Irizarry RA, Leek JT. Significance analysis and statistical dissection of variably methylated regions. *Biostatistics.* 2012;13(1):166-178. doi:10.1093/biostatistics/kxr013
49. Butcher LM, Beck S. Probe Lasso: a novel method to rope in differentially methylated regions with 450K DNA methylation data. *Methods.* 2015;72:21-28. doi:10.1016/j.ymeth.2014.10.036
50. Wright ML, Dozmorov MG, Wolen AR, et al. Establishing an analytic pipeline for genome-wide DNA methylation. *Clin Epigenetics.* 2016;8:45. doi:10.1186/s13148-016-0212-7
51. Hochberg Y, Benjamini Y. More powerful procedures for multiple significance testing. *Stat Med.* 1990;9(7):811-818.
52. Bates M, Martin M, Bolker B, Walker S. Fitting linear mixed-effects models using lme4. *Journal of Statistical Software.* 2015;67(1):1-48.
53. Tusher VG, Tibshirani R, Chu G. Significance analysis of microarrays applied to the ionizing radiation response. *Proc Natl Acad Sci U S A.* 2001;98(9):5116-5121. doi:10.1073/pnas.091062498
54. R Core Team. *A Language and Environment for Statistical Computing.* Vienna, Austria: R Foundation for Statistical Computing; 2013.

55. Carlson MRJ, Pages H, Arora S, Obenchain V, Morgan M. Genomic Annotation Resources in R/Bioconductor. *Methods Mol Biol.* 2016;1418:67-90. doi:10.1007/978-1-4939-3578-9\_4
56. Ashburner M, Ball CA, Blake JA, et al. Gene ontology: tool for the unification of biology. The Gene Ontology Consortium. *Nat Genet.* 2000;25(1):25-29. doi:10.1038/75556
57. Yu G, Wang L-G, Han Y, He Q-Y. clusterProfiler: an R package for comparing biological themes among gene clusters. *OMICS.* 2012;16(5):284-287. doi:10.1089/omi.2011.0118
58. Martin Morgan. AnnotationHub: Client to access AnnotationHub resource.
59. Faraway JJ. *Extending the Linear Model with R: Generalized Linear, Mixed Effects and Nonparametric Regression Models.* New York: Chapman and Hall; 2006.
60. Peek SL, Mah KM, Weiner JA. Regulation of neural circuit formation by protocadherins. *Cell Mol Life Sci.* 2017;74(22):4133-4157. doi:10.1007/s00018-017-2572-3
61. Lefebvre JL, Kostadinov D, Chen WV, Maniatis T, Sanes JR. Protocadherins mediate dendritic self-avoidance in the mammalian nervous system. *Nature.* 2012;488(7412):517-521. doi:10.1038/nature11305
62. Suo L, Lu H, Ying G, Capecchi MR, Wu Q. Protocadherin clusters and cell adhesion kinase regulate dendrite complexity through Rho GTPase. *J Mol Cell Biol.* 2012;4(6):362-376. doi:10.1093/jmcb/mjs034
64. Chen WV, Maniatis T. Clustered protocadherins. *Development.* 2013;140(16):3297-3302. doi:10.1242/dev.090621
65. Hayashi S, Takeichi M. Emerging roles of protocadherins: from self-avoidance to enhancement of motility. *J Cell Sci.* 2015;128(8):1455-1464. doi:10.1242/jcs.166306
66. Hirano S, Takeichi M. Cadherins in brain morphogenesis and wiring. *Physiol Rev.* 2012;92(2):597-634. doi:10.1152/physrev.00014.2011
67. Hirayama T, Yagi T. Regulation of clustered protocadherin genes in individual neurons. *Semin Cell Dev Biol.* 2017;69:122-130. doi:10.1016/j.semcdb.2017.05.026
68. Pedrosa E, Stefanescu R, Margolis B, et al. Analysis of protocadherin alpha gene enhancer polymorphism in bipolar disorder and schizophrenia. *Schizophr Res.* 2008;102(1-3):210-219. doi:10.1016/j.schres.2008.04.013
69. Anitha A, Thanseem I, Nakamura K, et al. Protocadherin alpha (PCDHA) as a novel susceptibility gene for autism. *J Psychiatry Neurosci.* 2013;38(3):192-198. doi:10.1503/jpn.120058
70. Dempster EL, Wong CCY, Lester KJ, et al. Genome-wide methylomic analysis of monozygotic twins discordant for adolescent depression. *Biol Psychiatry.* 2014;76(12):977-983. doi:10.1016/j.biopsych.2014.04.013

71. Cordova-Palomera A, Fatjo-Vilas M, Gasto C, Navarro V, Krebs M-O, Fananas L. Genome-wide methylation study on depression: differential methylation and variable methylation in monozygotic twins. *Transl Psychiatry*. 2015;5:e557. doi:10.1038/tp.2015.49
72. Xiao X, Zheng F, Chang H, et al. The Gene Encoding Protocadherin 9 (PCDH9), a Novel Risk Factor for Major Depressive Disorder. *Neuropsychopharmacology*. 2018;43(5):1128-1137. doi:10.1038/npp.2017.241
73. Chang H, Hoshina N, Zhang C, et al. The protocadherin 17 gene affects cognition, personality, amygdala structure and function, synapse development and risk of major mood disorders. *Mol Psychiatry*. 2018;23(2):400-412. doi:10.1038/mp.2016.231
74. Russo SJ, Nestler EJ. The brain reward circuitry in mood disorders. *Nat Rev Neurosci*. 2013;14(9):609-625. doi:10.1038/nrn3381
75. Kim SY, Mo JW, Han S, et al. The expression of non-clustered protocadherins in adult rat hippocampal formation and the connecting brain regions. *Neuroscience*. 2010;170(1):189-199. doi:10.1016/j.neuroscience.2010.05.027
76. Weiner RD, Reti IM. Key updates in the clinical application of electroconvulsive therapy. *Int Rev Psychiatry*. 2017;29(2):54-62. doi:10.1080/09540261.2017.1309362
77. Yoshinaga S, Nakajima K. A crossroad of neuronal diversity to build circuitry. *Science*. 2017;356(6336):376-377. doi:10.1126/science.aan2856
78. Katori S, Hamada S, Noguchi Y, et al. Protocadherin-alpha family is required for serotonergic projections to appropriately innervate target brain areas. *J Neurosci*. 2009;29(29):9137-9147. doi:10.1523/JNEUROSCI.5478-08.2009
79. Katori S, Noguchi-Katori Y, Okayama A, et al. Protocadherin-alphaC2 is required for diffuse projections of serotonergic axons. *Sci Rep*. 2017;7(1):15908. doi:10.1038/s41598-017-16120-y
80. Wu Y, Hou F, Wang X, Kong Q, Han X, Bai B. Aberrant Expression of Histone Deacetylases 4 in Cognitive Disorders: Molecular Mechanisms and a Potential Target. *Front Mol Neurosci*. 2016;9:114. doi:10.3389/fnmol.2016.00114
81. Uchida S, Shumyatsky GP. Synaptically Localized Transcriptional Regulators in Memory Formation. *Neuroscience*. 2018;370:4-13. doi:10.1016/j.neuroscience.2017.07.023
82. Kim M-S, Akhtar MW, Adachi M, et al. An essential role for histone deacetylase 4 in synaptic plasticity and memory formation. *J Neurosci*. 2012;32(32):10879-10886. doi:10.1523/JNEUROSCI.2089-12.2012
83. MacQueen GM, Memedovich KA. Cognitive dysfunction in major depression and bipolar disorder: Assessment and treatment options. *Psychiatry Clin Neurosci*. 2017;71(1):18-27. doi:10.1111/pcn.12463
84. Talarowska M, Berk M, Maes M, Galecki P. Autobiographical memory dysfunctions in depressive disorders. *Psychiatry Clin Neurosci*. 2016;70(2):100-108. doi:10.1111/pcn.12370

85. Covington HE 3rd, Maze I, Vialou V, Nestler EJ. Antidepressant action of HDAC inhibition in the prefrontal cortex. *Neuroscience*. 2015;298:329-335. doi:10.1016/j.neuroscience.2015.04.030
86. Covington HE 3rd, Maze I, LaPlant QC, et al. Antidepressant actions of histone deacetylase inhibitors. *J Neurosci*. 2009;29(37):11451-11460. doi:10.1523/JNEUROSCI.1758-09.2009
87. Covington HE 3rd, Vialou VF, LaPlant Q, Ohnishi YN, Nestler EJ. Hippocampal-dependent antidepressant-like activity of histone deacetylase inhibition. *Neurosci Lett*. 2011;493(3):122-126. doi:10.1016/j.neulet.2011.02.022
88. Meylan EM, Halfon O, Magistretti PJ, Cardinaux J-R. The HDAC inhibitor SAHA improves depressive-like behavior of CRTC1-deficient mice: Possible relevance for treatment-resistant depression. *Neuropharmacology*. 2016;107:111-121. doi:10.1016/j.neuropharm.2016.03.012
89. Bi L-L, Sun X-D, Zhang J, et al. Amygdala NRG1-ErbB4 is critical for the modulation of anxiety-like behaviors. *Neuropsychopharmacology*. 2015;40(4):974-986. doi:10.1038/npp.2014.274
90. Wang Y-N, Figueiredo D, Sun X-D, et al. Controlling of glutamate release by neuregulin3 via inhibiting the assembly of the SNARE complex. *Proc Natl Acad Sci U S A*. 2018;115(10):2508-2513. doi:10.1073/pnas.1716322115
91. Chong VZ, Thompson M, Beltaifa S, Webster MJ, Law AJ, Weickert CS. Elevated neuregulin-1 and ErbB4 protein in the prefrontal cortex of schizophrenic patients. *Schizophr Res*. 2008;100(1-3):270-280. doi:10.1016/j.schres.2007.12.474
92. Wen Z, Chen J, Khan RAW, et al. Genetic association between NRG1 and schizophrenia, major depressive disorder, bipolar disorder in Han Chinese population. *Am J Med Genet B Neuropsychiatr Genet*. 2016;171B(3):468-478. doi:10.1002/ajmg.b.32428
93. Mostaid MS, Lloyd D, Liberg B, et al. Neuregulin-1 and schizophrenia in the genome-wide association study era. *Neurosci Biobehav Rev*. 2016;68:387-409. doi:10.1016/j.neubiorev.2016.06.001
94. McIntosh AM, Hall J, Lymer GKS, Sussmann JED, Lawrie SM. Genetic risk for white matter abnormalities in bipolar disorder. *Int Rev Psychiatry*. 2009;21(4):387-393. doi:10.1080/09540260902962180
95. Chen X, Long F, Cai B, Chen X, Qin L, Chen G. A Novel Relationship for Schizophrenia, Bipolar, and Major Depressive Disorder. Part 8: a Hint from Chromosome 8 High Density Association Screen. *Mol Neurobiol*. 2017;54(8):5868-5882. doi:10.1007/s12035-016-0102-1
96. Biological insights from 108 schizophrenia-associated genetic loci. *Nature*. 2014;511(7510):421-427. doi:10.1038/nature13595
97. Ruderfer DM, Fanous AH, Ripke S, et al. Polygenic dissection of diagnosis and clinical dimensions of bipolar disorder and schizophrenia. *Mol Psychiatry*. 2014;19(9):1017-1024. doi:10.1038/mp.2013.138

98. Sekar A, Bialas AR, de Rivera H, et al. Schizophrenia risk from complex variation of complement component 4. *Nature*. 2016;530(7589):177-183. doi:10.1038/nature16549
99. Athanasiu L, Giddaluru S, Fernandes C, et al. A genetic association study of CSMD1 and CSMD2 with cognitive function. *Brain Behav Immun*. 2017;61:209-216. doi:10.1016/j.bbi.2016.11.026
100. Donohoe G, Walters J, Hargreaves A, et al. Neuropsychological effects of the CSMD1 genome-wide associated schizophrenia risk variant rs10503253. *Genes Brain Behav*. 2013;12(2):203-209. doi:10.1111/gbb.12016
101. Koiliari E, Roussos P, Pasparakis E, et al. The CSMD1 genome-wide associated schizophrenia risk variant rs10503253 affects general cognitive ability and executive function in healthy males. *Schizophr Res*. 2014;154(1-3):42-47. doi:10.1016/j.schres.2014.02.017
102. Sherva R, Wang Q, Kranzler H, et al. Genome-wide Association Study of Cannabis Dependence Severity, Novel Risk Variants, and Shared Genetic Risks. *JAMA Psychiatry*. 2016;73(5):472-480. doi:10.1001/jamapsychiatry.2016.0036
103. Lotan A, Fenckova M, Bralten J, et al. Neuroinformatic analyses of common and distinct genetic components associated with major neuropsychiatric disorders. *Front Neurosci*. 2014;8:331. doi:10.3389/fnins.2014.00331
104. Story Jovanova O, Nedeljkovic I, Derek S, et al. DNA Methylation Signatures of Depressive Symptoms in Middle-aged and Elderly Persons: Meta-analysis of Multiethnic Epigenome-wide Studies. *JAMA Psychiatry*. July 2018. doi:10.1001/jamapsychiatry.2018.1725
105. Brezo J, Bureau A, Merette C, et al. Differences and similarities in the serotonergic diathesis for suicide attempts and mood disorders: a 22-year longitudinal gene-environment study. *Mol Psychiatry*. 2010;15(8):831-843. doi:10.1038/mp.2009.19
106. Dong Z-Q, Li X-R, He L, He G, Yu T, Sun X-L. 5-HTR1A and 5-HTR2A genetic polymorphisms and SSRI antidepressant response in depressive Chinese patients. *Neuropsychiatr Dis Treat*. 2016;12:1623-1629. doi:10.2147/NDT.S93562
107. Yosifova A, Mushiroda T, Stoianov D, et al. Case-control association study of 65 candidate genes revealed a possible association of a SNP of HTR5A to be a factor susceptible to bipolar disease in Bulgarian population. *J Affect Disord*. 2009;117(1-2):87-97. doi:10.1016/j.jad.2008.12.021
108. Hasin DS, Sarvet AL, Meyers JL, et al. Epidemiology of Adult DSM-5 Major Depressive Disorder and Its Specifiers in the United States. *JAMA Psychiatry*. 2018;75(4):336-346. doi:10.1001/jamapsychiatry.2017.4602
109. American Psychiatric Association. *Diagnostic and Statistical Manual of Mental Disorders, 5th Edition.*; 2013.



110. Kendler KS, Neale MC, Kessler RC, Heath AC, Eaves LJ. A population-based twin study of major depression in women. The impact of varying definitions of illness. *Arch Gen Psychiatry*. 1992;49(4):257-266.
111. Meier A. The research diagnostic criteria: historical background, development, validity, and reliability. *Can J Psychiatry*. 1979;24(2):167-178.
112. Endicott J, Spitzer RL. Use of the Research Diagnostic Criteria and the Schedule for Affective Disorders and Schizophrenia to study affective disorders. *Am J Psychiatry*. 1979;136(1):52-56. doi:10.1176/ajp.136.1.52
113. Spitzer RL, Endicott J, Robins E. Research diagnostic criteria. *Psychopharmacol Bull*. 1975;11(3):22-25.
114. Spitzer RL, Endicott J, Robins E. Research diagnostic criteria: rationale and reliability. *Arch Gen Psychiatry*. 1978;35(6):773-782.
115. Kasriel J, Eaves L. The zygoty of twins: further evidence on the agreement between diagnosis by blood groups and written questionnaires. *J Biosoc Sci*. 1976;8(3):263-266.
116. Jackson RW, Snieder H, Davis H, Treiber FA. Determination of twin zygoty: a comparison of DNA with various questionnaire indices. *Twin Res*. 2001;4(1):12-18.
117. Bibikova M, Barnes B, Tsan C, et al. High density DNA methylation array with single CpG site resolution. *Genomics*. 2011;98(4):288-295. doi:10.1016/j.ygeno.2011.07.007
118. Morris TJ, Beck S. Analysis pipelines and packages for Infinium HumanMethylation450 BeadChip (450k) data. *Methods*. 2015;72:3-8. doi:10.1016/j.ymeth.2014.08.011
119. Aryee MJ, Jaffe AE, Corrada-Bravo H, et al. Minfi: a flexible and comprehensive Bioconductor package for the analysis of Infinium DNA methylation microarrays. *Bioinformatics*. 2014;30(10):1363-1369. doi:10.1093/bioinformatics/btu049
120. Barfield RT, Almlı LM, Kilaru V, et al. Accounting for population stratification in DNA methylation studies. *Genet Epidemiol*. 2014;38(3):231-241. doi:10.1002/gepi.21789
121. Du P, Zhang X, Huang C-C, et al. Comparison of Beta-value and M-value methods for quantifying methylation levels by microarray analysis. *BMC Bioinformatics*. 2010;11:587. doi:10.1186/1471-2105-11-587
122. Chen Y, Lemire M, Choufani S, et al. Discovery of cross-reactive probes and polymorphic CpGs in the Illumina Infinium HumanMethylation450 microarray. *Epigenetics*. 2013;8(2):203-209. doi:10.4161/epi.23470
123. Touleimat N, Tost J. Complete pipeline for Infinium((R)) Human Methylation 450K BeadChip data processing using subset quantile normalization for accurate DNA methylation estimation. *Epigenomics*. 2012;4(3):325-341. doi:10.2217/epi.12.21
124. Leek JT, Scharpf RB, Bravo HC, et al. Tackling the widespread and critical impact of batch effects in high-throughput data. *Nat Rev Genet*. 2010;11(10):733-739. doi:10.1038/nrg2825

125. Leek JT, Johnson WE, Parker HS, Jaffe AE, Storey JD. The sva package for removing batch effects and other unwanted variation in high-throughput experiments. *Bioinformatics*. 2012;28(6):882-883. doi:10.1093/bioinformatics/bts034
126. Houseman EA, Kelsey KT, Wiencke JK, Marsit CJ. Cell-composition effects in the analysis of DNA methylation array data: a mathematical perspective. *BMC Bioinformatics*. 2015;16:95. doi:10.1186/s12859-015-0527-y



## Acknowledgements

The research outcomes presented in this manuscript were supported by a NARSAD Independent Investigator Award from the *Brain and Behavior Research Foundation* to the first author (RRN).

The development of analytic methods were supported by a NARSAD Independent Investigator Award from the *Brain and Behavior Research Foundation* to the last author (TPY).

**Table 1. Demographic and clinical characteristics of twins meeting definite or probable DSM-5 criteria for lifetime history of MD (MD Affected) versus no lifetime history of MD (MD Unaffected).**

|                                            | <i>M</i> (SD) or n (%) |                     | <i>t</i> / $\chi^2$ | <i>p</i> |
|--------------------------------------------|------------------------|---------------------|---------------------|----------|
|                                            | MD Unaffected<br>n=111 | MD Affected<br>n=39 |                     |          |
| <b>Demographic/Sample</b>                  |                        |                     |                     |          |
| Age, years                                 | 17.49 (1.3)            | 17.60 (1.3)         | 0.66                | 0.51     |
| Sex, Female                                | 81 (73.0%)             | 29 (74.4%)          | 0.28                | 0.87     |
| Ethnicity, Hispanic                        | 5 (4.5%)               | 3 (7.7%)            | 0.58                | 0.43     |
| Nicotine Use <sup>§</sup> , Current Smoker | 2 (1.8%)               | 3 (7.7%)            | 3.11                | 0.11     |
| <b>Clinical Characteristics</b>            |                        |                     |                     |          |
| SMFQ                                       | 4.4 (3.7)              | 9.0 (6.0)           | 6.40                | <.001    |
| History of psychotropic medication use     | 2 (1.8%)               | 4 (10.3%)           | 0.64                | 0.62     |
| Panic Disorder                             | 5 (4.5%)               | 3 (7.7%)            | 0.56                | 0.43     |
| Social Anxiety Disorder                    | 10 (9.1%)              | 8 (20.5%)           | 3.54                | 0.08     |
| Specific Phobia                            | 8 (7.3%)               | 7 (17.9%)           | 3.63                | 0.07     |
| Generalized Anxiety Disorder               | 2 (1.8%)               | 4 (10.3%)           | 5.31                | 0.04     |
| <b>MD Features</b>                         |                        |                     |                     |          |
| Age of Onset (years)                       | ---                    | 14.9 (1.7)          |                     |          |
| Number of Major Depressive Episodes, n     |                        |                     |                     |          |
| 1 episode                                  | ---                    | 17 (43.6%)          |                     |          |
| 2-3 episodes                               | ---                    | 16 (41.0%)          |                     |          |
| 3-5 episodes                               | ---                    | 3 (7.7%)            |                     |          |
| ≥6 episodes                                | ---                    | 3 (7.7%)            |                     |          |
| Number of symptoms during worst MDE        | ---                    | 5.69 (1.1)          |                     |          |

*Note:* SMFQ=Short Mood and Feelings Questionnaire.<sup>§</sup>Fagerstrom Test for Nicotine Dependence score ranged 2 (low dependence) to 6 (moderate dependence) with Mode=2, Median=2, and Mean=3.

**Figure 1. Overlap with PGC GWAS of major depression.** The ‘MD locus’ (purple box) represents a region of chromosome 6 extending from 27.7–32.8 Mb found to be significantly associated with depression by Wray et al. (2018). Summary statistics from this study are plotted for the relevant regional markers in the Manhattan plot. Colored ticks represent the 3 DMRs (blue) and 1 VMR (red) located in this region. Individual plots above provide a zoomed-in view of the genomic context surrounding each methylation region and probe-level test statistics. Chromatin states within GM12878 lymphoblastoid cells are indicated by color coding the ChromHMM track.

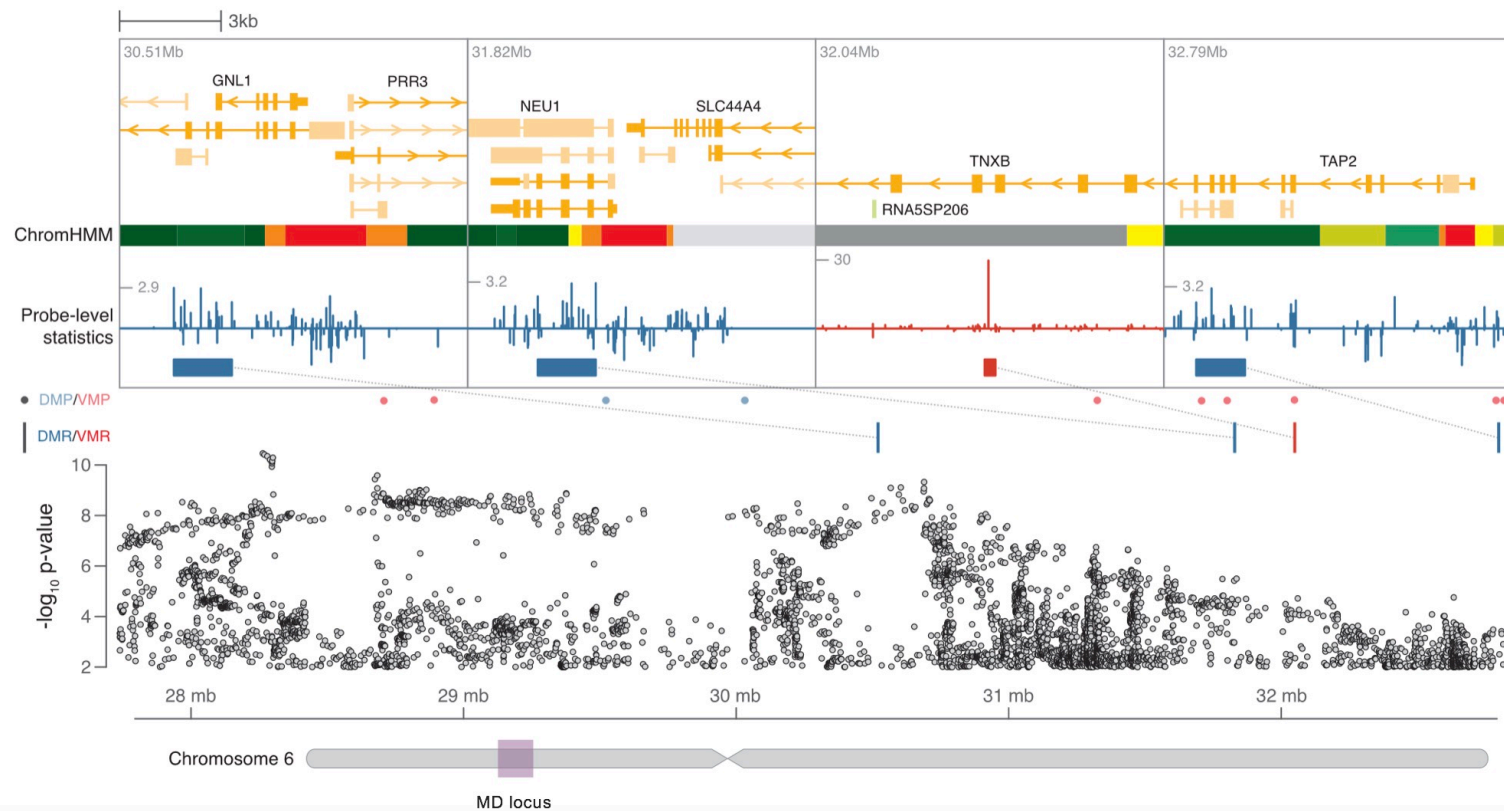

**Table 2. Differentially methylated regions (DMRs) where MD affected twins exhibited higher means compared to MD unaffected twins.**

| <b>Chromosome</b> | <b>Start</b> | <b>End</b> | <b>Symbol</b> | <b>EntrezID</b> | <b>Number_CpG</b> | <b>Empirical_AUC</b> |
|-------------------|--------------|------------|---------------|-----------------|-------------------|----------------------|
| chr1              | 36787678     | 36789401   | SH3D21        | 79729           | 3                 | 3836.3652            |
| chr1              | 221053841    | 221055665  | HLX           | 3142            | 4                 | 4242.3503            |
| chr2              | 240035107    | 240036791  | HDAC4         | 9759            | 3                 | 4057.6444            |
| chr5              | 1090741      | 1092417    | SLC12A7       | 10723           | 4                 | 3818.3311            |
| chr5              | 171709917    | 171711524  | UBTD2         | 92181           | 3                 | 4070.7302            |
| chr5              | 176936563    | 176938522  | DOK3          | 79930           | 6                 | 3826.3018            |
| chr6              | 30519905     | 30521619   | NA            | NA              | 5                 | 3861.8967            |
| chr6              | 31828260     | 31830030   | NA            | NA              | 4                 | 4558.5396            |
| chr6              | 32797253     | 32798887   | NA            | NA              | 4                 | 3849.6722            |
| chr6              | 39281541     | 39283313   | KCNK17        | 89822           | 3                 | 4122.0762            |
| chr6              | 146863647    | 146865487  | RAB32         | 10981           | 7                 | 4701.7437            |
| chr16             | 2023998      | 2025868    | TBL3          | 10607           | 4                 | 4329.8853            |
| chr16             | 58767249     | 58769104   | GOT2          | 2806            | 4                 | 4046.9261            |
| chr17             | 46659019     | 46660940   | HOXB3         | 3213            | 4                 | 4501.7814            |
| chr17             | 70116185     | 70118162   | SOX9          | 6662            | 4                 | 4120.2233            |
| chr19             | 13213428     | 13215387   | LYL1          | 4066            | 3                 | 4381.7764            |
| chr21             | 38069321     | 38070994   | NA            | NA              | 4                 | 3892.4767            |

**Table 3. Variably methylated regions (VMRs) where MD affected twins exhibited greater variance compared to MD unaffected twins.**

| <b>Chromosome</b> | <b>Start</b> | <b>End</b> | <b>Symbol</b> | <b>EntrezID</b> | <b>Number_CpG</b> | <b>Empirical_AUC</b> |
|-------------------|--------------|------------|---------------|-----------------|-------------------|----------------------|
| chr3              | 39321449     | 39323539   | CX3CR1        | 1524            | 4                 | 5572.9239            |
| chr3              | 46925081     | 46925524   | PTH1R         | 5745            | 2                 | 5031.1289            |
| chr3              | 170136920    | 170137321  | CLDN11        | 5010            | 2                 | 5110.2437            |
| chr6              | 32049516     | 32049825   | NA            | NA              | 3                 | 5038.8717            |
| chr6              | 169284344    | 169287304  | NA            | NA              | 5                 | 5276.0094            |
| chr6              | 170595385    | 170597898  | DLL1          | 28514           | 8                 | 5628.6246            |
| chr7              | 157225062    | 157225567  | NA            | NA              | 2                 | 5131.4817            |
| chr10             | 134739746    | 134741032  | CFAP46        | 54777           | 4                 | 5667.4646            |
| chr11             | 64510112     | 64513156   | RASGRP2       | 10235           | 7                 | 5458.4387            |
| chr17             | 40837037     | 40839469   | CNTNAP1       | 8506            | 4                 | 5035.574             |

**Table 4. Gene enrichment analysis summary.**

|            | <b>Ontology Category</b> | <b>Description</b>                                             | <b>Gene Ratio</b> | <b>q-value</b> | <b>Gene Symbol</b>                                                                                                                                                                                                                                                                                                                                                                             |
|------------|--------------------------|----------------------------------------------------------------|-------------------|----------------|------------------------------------------------------------------------------------------------------------------------------------------------------------------------------------------------------------------------------------------------------------------------------------------------------------------------------------------------------------------------------------------------|
| GO:0007156 | Biological Process       | homophilic cell adhesion via plasma membrane adhesion molecule | 23, 568           | 0.00002        | CDH3, CDH6, PCDH $\alpha$ C1-2, PCDH $\alpha$ 1-13, PCDH10, PCDH20, PTPRT, CADM1, PLXNB3, CLSTN2                                                                                                                                                                                                                                                                                               |
| GO:0098742 | Biological Process       | cell-cell adhesion via plasma-membrane adhesion molecules      | 28, 568           | 0.00002        | CDH3, CDH6, PTPRT, CLDN4, CADM1, GRID2, ITGA5, CLDN11, PLXNB3, PCDH $\alpha$ C1-2, PCDH $\alpha$ 1-13, PCDH20, PTPRD, CLSTN2                                                                                                                                                                                                                                                                   |
| GO:0044306 | Cellular Function        | neuron projection terminus                                     | 14, 605           | 0.05888        | BAIAP2, AAK1, CYFIP1, SYT11, PACSIN1, ILK, PFN2, PNOC, PVALB, DNAJC5, MOB2, NAPA, BSN, AP3D1                                                                                                                                                                                                                                                                                                   |
| GO:0043195 | Cellular Function        | terminal bouton                                                | 9, 605            | 0.05888        | AAK1, CYFIP1, SYT11, ILK, PFN2, PVALB, DNAJC5, NAPA, AP3D1                                                                                                                                                                                                                                                                                                                                     |
| GO:0033267 | Cellular Function        | axon part                                                      | 16, 605           | 0.07314        | AAK1, TRAK1, CYFIP1, SYT11, KIF13B, AP3M1, NRG1, ILK, PFN2, PVALB, SPG7, DAGLA, DNAJC5, CNTNAP1, NAPA, AP3D1                                                                                                                                                                                                                                                                                   |
| GO:0044463 | Cellular Function        | cell projection part                                           | 54, 605           | 0.08617        | AKAP9, RASGRP2, BAIAP2, DCTN2, IGF2BP1, EHD1, CNGA4, PACRG, EPS8, ENKUR, SPATA13, AAK1, TRAK1, CYFIP1, SYT11, KIF13B, TBC1D30, GPR161, AP3M1, NPHP3, BBS9, GRID2, PACSIN1, NRG1, ILK, ITGA5, KCNC3, PDE6B, PFN2, PNOC, SSH1, CFAP46, CCDC40, PRKAR1B, TTYH1, PTH1R, TENM2, PVALB, BBS2, MAP2K4, SLC22A5, SPG7, TIMP2, DAGLA, CA9, JADE1, DNAJC5, MOB2, CNTNAP1, NAPA, BSN, AP3D1, DHRS3, RAB28 |

|            |                      |            |         |         |                                                                                                                                                                                         |
|------------|----------------------|------------|---------|---------|-----------------------------------------------------------------------------------------------------------------------------------------------------------------------------------------|
| GO:0030424 | Cellular<br>Function | Axon       | 26, 605 | 0.08617 | IGF2BP1, DAB2IP, EPHB2, AAK1, TRAK1, CYFIP1, SYT11, KIF13B, LDLRAP1, AP3M1, NRG1, ILK, KCNC3, NF1, PFN2, SLC17A7, SEMA6A, PVALB, MAP2K4, SPG7, DAGLA, DNAJC5, CNTNAP1, NAPA, BSN, AP3D1 |
| GO:0098793 | Cellular<br>Function | Presynapse | 24, 605 | 0.08617 | BAIAP2, AAK1, CYFIP1, SYT11, DMXL2, AMPH, GRIK4, GRM8, PACSIN1, HIP1, APBA2, ILK, KCNC3, NF1, SYT17, PFN2, PNOC, PI4K2A, SLC17A7, PVALB, DNAJC5, NAPA, BSN, AP3D1                       |

---

## SUPPLEMENTAL METHODS

The primary definition of MD affected status required presence of at least one DSM-5 MDE lasting at least two weeks<sup>109</sup>. MD was considered present if criteria were met at either a definite or a probable level. A definite diagnosis was made when a twin endorsed at least five DSM-5 Criterion A MDE symptoms (e.g., low energy, recurrent thoughts of death, inability to concentrate) of which at least one symptom had to include the presence of low mood and/or anhedonia most of the day, nearly every day for at least two weeks during their worst episode. Probable diagnoses were made when a twin endorsed at least 4 symptoms, one of which had to include the presence of low mood and/or anhedonia most of the day, nearly every day. The use of definite and probable levels allows for the inclusion of twins who may not be currently symptomatic and, therefore, have to rely on retrospective memory to determine their symptom presentation. The use of probable levels of diagnosis also is justified given that twins expressing nearly all symptoms of a MDE are more similar to a case than a control symptomatically and for depressive risk factors<sup>110</sup>. This approach to diagnosis was introduced as part of the Research Diagnostic Criteria and has been applied in many studies<sup>111–114</sup>. To qualify for MD at the definite or probable level, participants also had to report that their depression symptoms caused clinically significant distress or functional impairment (i.e., Criterion C). MD unaffected status was defined as no lifetime diagnosis of MD at the probable or definite threshold. The expanded MD section of the CIDI-SF followed by the lifetime MD algorithm is presented below.

### **Lifetime Major Depression Diagnostic Questions: Criterion A (MDE Symptoms)**

1. Have you ever had a time in your life when you felt sad, blue, or depressed or two weeks or more in a row? (yes/no)
2. Have you ever had a time in your life lasting two weeks or more when you lost interest in most things like hobbies, work, or activities that usually give you pleasure? (yes/no)
3. During those worst two weeks, did the feelings of sadness or loss of interest usually last all day long, most of the day, about half of the day, or less than half of the day? (All day long, Most of the day, About half of the day, Less than half of the day)
4. Did you feel this way every day, almost every day, or less often during the two weeks? (Every day, Almost every day, Less often)

If a participant responded “yes” to questions 1 OR 2 AND endorsed “all day long” or “most of the day” to question 3 AND responded “every day” or “almost every day” to question 4, they entered the MD section and were queried regarding other DSM-5 Criterion A symptoms of MD (see below).

5. Thinking about those same two weeks, did you feel more tired out or low on energy than is usual for you? (yes/no)
6. Did you gain or lose weight without trying or did you stay about the same? (Gained weight, Lost weight, Gained and lost weight, stayed about the same, I was on a diet)
7. About how much weight did you gain/you lose/your weight change? (numeric response)
8. Did you have more trouble falling asleep or staying asleep than you usually do during those two weeks? (yes/no)
  - a. Did that happen every night, nearly every night, or less often during those two weeks? (Every night, Nearly every night, Less often)
9. During those two weeks, did you have a lot more trouble concentrating or making decisions than usual? (yes/no)



10. People sometimes feel down on themselves, no good, or worthless, or have excessive guilt and blame themselves for things. During that two-week period, did you feel this way? (yes/no)
11. Did you think a lot about death – either your own, someone else's, or death in general during those two weeks? (yes/no)

### **Criterion C (Functional Interference):**

12. Did you ever tell a professional about these problems (such as a medical doctor, psychologist, social worker, counselor, nurse, clergy, or other helping professional)? (yes/no)
  13. Did you ever take medication for these problems? (yes/no)
  14. How much did these problems interfere with your life or activities – a lot, some, a little, or not at all? (A lot, Some, A little, Not at all)
- \*additional questions regarding age of onset, timing of last episode, etc. were queried.

### **MD Algorithm**

Questions 6 and 7 were recoded so that a response of “Gained weight” or “Gained and lost weight,” along with at least a response of 5 pounds in question 7, was coded as endorsement of weight gain/loss. Participants who endorsed question 8 also were presented with question 8a. Sleep symptoms were considered present if a participant answered “Every night” or “Nearly every night” on question 8a. Responses to queries 1, 2, 5, weight gain, sleep symptoms, 9, 10, and 11 were summed as the total number of depression symptoms endorsed during the twin's worst MDE. Participants were deemed to have experienced significant distress if they endorsed question 14 as “a lot” or “some” and/or if they endorsed question 12 or 13 as “yes”. MD at the full threshold level was coded positive if the participant endorsed question 1 or 2 along with question 3 as “All day long” or “Most of the day,” and question 4 as “Every day” or “Almost every day,” and at least 4 other depression symptoms for a total of at least 5 symptoms. MD at the full threshold level also required significant distress. MD was coded positive at the probable level if the participant endorsed question 1 or 2 as well as question 3 (“All day long” / “Most of the day”) and question 4 (“Every day” / “Almost every day”) and at least 3 other depression symptoms for a total of 4 symptoms. The probable level also required endorsement of significant distress (i.e., endorsed question 12, 13, or 14 as “a lot” or “some”).

### **Exclusionary Criteria**

Participants were not eligible for the current study if they met any of the following criteria: 1) current use of psychotropic medications (e.g., antianxiety/antidepressants) or medications with psychotropic effects (e.g., beta-adrenergic blockers), b) diagnosis of an autism spectrum disorder, c) diagnosis of an intellectual disability, d) diagnosis of a spatial learning disorder, or prior testing indicating an IQ below 70, e) seizure without a clear and resolved etiology, f) current or past episodes of psychosis, g) serious, not stabilized illness (e.g., liver, kidney, gastrointestinal, respiratory, cardiovascular, endocrinologic, neurologic, immunologic, or blood disease), h) inadequate production of human growth hormone, i) sensory integration disorder, j) congenital adrenal hyperplasia, k) adrenal inefficiency, l) deaf with bicochlear implants, m) cancer (current or past diagnosis), and n) pregnancy (current or lifetime). If only one twin from the twin pair met any of the exclusionary criteria, the whole pair was excluded.

### **Zygosity**

Zygosity status (monozygotic [MZ] versus dizygotic [DZ]) for adolescent twins (age  $\leq 17$ ) was determined based on parent-report about physical similarities between twins. Adult twins (age  $\geq 18$ ) not accompanied by a parent/legal guardian completed the zygosity questionnaire

about themselves. Prior research has demonstrated high validity for this zygosity assessment as compared to blood<sup>115</sup> and DNA evaluations of zygosity<sup>116</sup>. MZ zygosity based on questionnaire assessment was confirmed using 65 SNP control probes included on the Infinium HumanMethylation450 (450K) array to verify sample identity. The control probes target polymorphic sequences, and values for each probe cluster into three groups corresponding to genotype. Together, the control probes provide strong support for validating zygosity. Only data from twins confirmed to be MZ were included in analyses.

## Genome-wide DNAm Measurement and Processing

Genomic DNA was isolated from whole blood according to standard methods using the Puregene DNA Isolation Kit (Qiagen). An aliquot of 1 microgram DNA per subject was processed by HudsonAlpha Institute for Biotechnology for bisulfite conversion (Zymo Research EZ Methylation Kit) and genome-wide methylation assayed on the Infinium Human Methylation 450K BeadChip microarray, which interrogates 485,764 features. Twin pairs were localized to the same slide to minimize any potential artifactual differences in DNAm patterns due to batch effects.

Details of the 450K microarray have been previously described<sup>117</sup>, and raw data processing was performed according to best practices reported in recent publications<sup>50,118</sup>. Intensity values from the scanned arrays were processed using the *minfi* Bioconductor package<sup>119</sup> in the R programming environment (R Development Core Team 2015). Confirmation of self-reported race was made by sample clustering derived from principal components estimated from ancestry informative probes<sup>120</sup>.

Quality was assessed both quantitatively and visually to identify deviant samples<sup>119</sup>. Beta values were derived as the ratio of the methylated probe intensity to the sum of the methylated and unmethylated probe intensities<sup>121</sup>. Beta value density plots from each array were inspected to tag poor performing arrays based on a large deviation from the rest of the samples. Probes were filtered if they had a detection P-value of greater than 0.01 in at least 10% of samples or if they have been previously identified as cross-hybridizing<sup>122</sup> leaving a total of 455,828 probes to analyze. Quantile normalization adapted to DNAm arrays<sup>123</sup> was applied to adjust the distribution of type I and II probes to the final set of screened sample arrays and probes.

For all statistical tests, *beta* values were transformed using the *M*-value procedure to promote normality and calculated as a logit transformation of the methylated and unmethylated intensity ratio along with an added constant to offset potentially small values<sup>121</sup>. Correlations between major experimental factors and the top 10 principal components of *M*-values across all arrays were inspected to identify extraneous structure that may account for any batch effects<sup>124</sup>. ComBat was used to remove average differences across arrays due to slide groupings<sup>125</sup>. Blood cell proportions were inferred for each sample to account for cellular heterogeneity<sup>126</sup>.

**Supplemental Table 1. Statistical contrasts fit to estimate the degrees of association between MD affected/unaffected status and genome-wide DNA methylation markers.**

|                   | Concord-<br>ant MD T1 | Concordant MD<br>T2 | Discordant<br>T1 | Discord-<br>ant T2 | Concord-<br>ant Healthy<br>T1 | Concordant<br>Healthy T2 |
|-------------------|-----------------------|---------------------|------------------|--------------------|-------------------------------|--------------------------|
| <b>contrast 1</b> | -1                    | -1                  | -1               | 1                  | 1                             | 1                        |
| <b>contrast 2</b> | -1                    | -1                  | 2                | 0                  | 0                             | 0                        |
| <b>contrast 3</b> | 0                     | 0                   | 0                | 2                  | -1                            | -1                       |
| <b>contrast 4</b> | -1                    | 1                   | 0                | 0                  | 0                             | 0                        |
| <b>contrast 5</b> | 0                     | 0                   | 0                | 0                  | -1                            | 1                        |

**Note: T1 = Twin 1 and T2 = Twin 2.**

**Supplemental Figure 1.** Bivariate distribution of DNAm probes, where one twin pair is discordant for a history of MD and the other is concordant healthy. A twin member from the discordant pair and the concordant healthy pair is then crossed in the upper right and lower left panels, creating “non-MZ” pairs. This figure shows that the bivariate distribution of DNAm marks differ between the concordant healthy and discordant twins, with the discordant pair showing greater variation between twins. The lower left panel, which represents an unrelated case-control, illustrates the substantial increase in variance, underscoring the utility of the co-twin control design to study environmental risk.

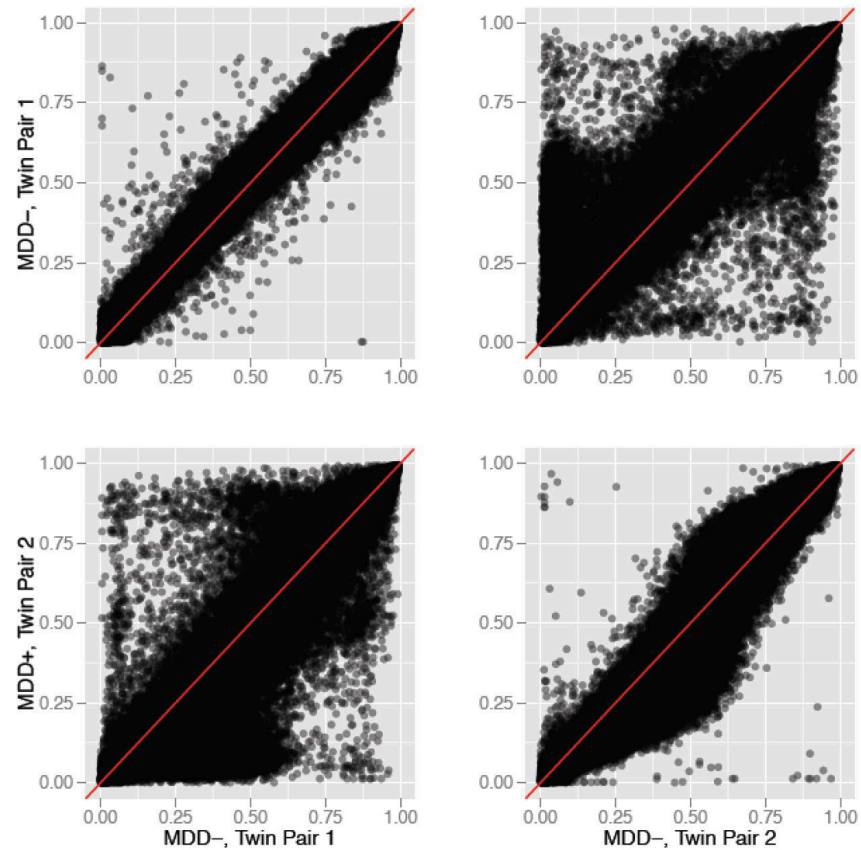

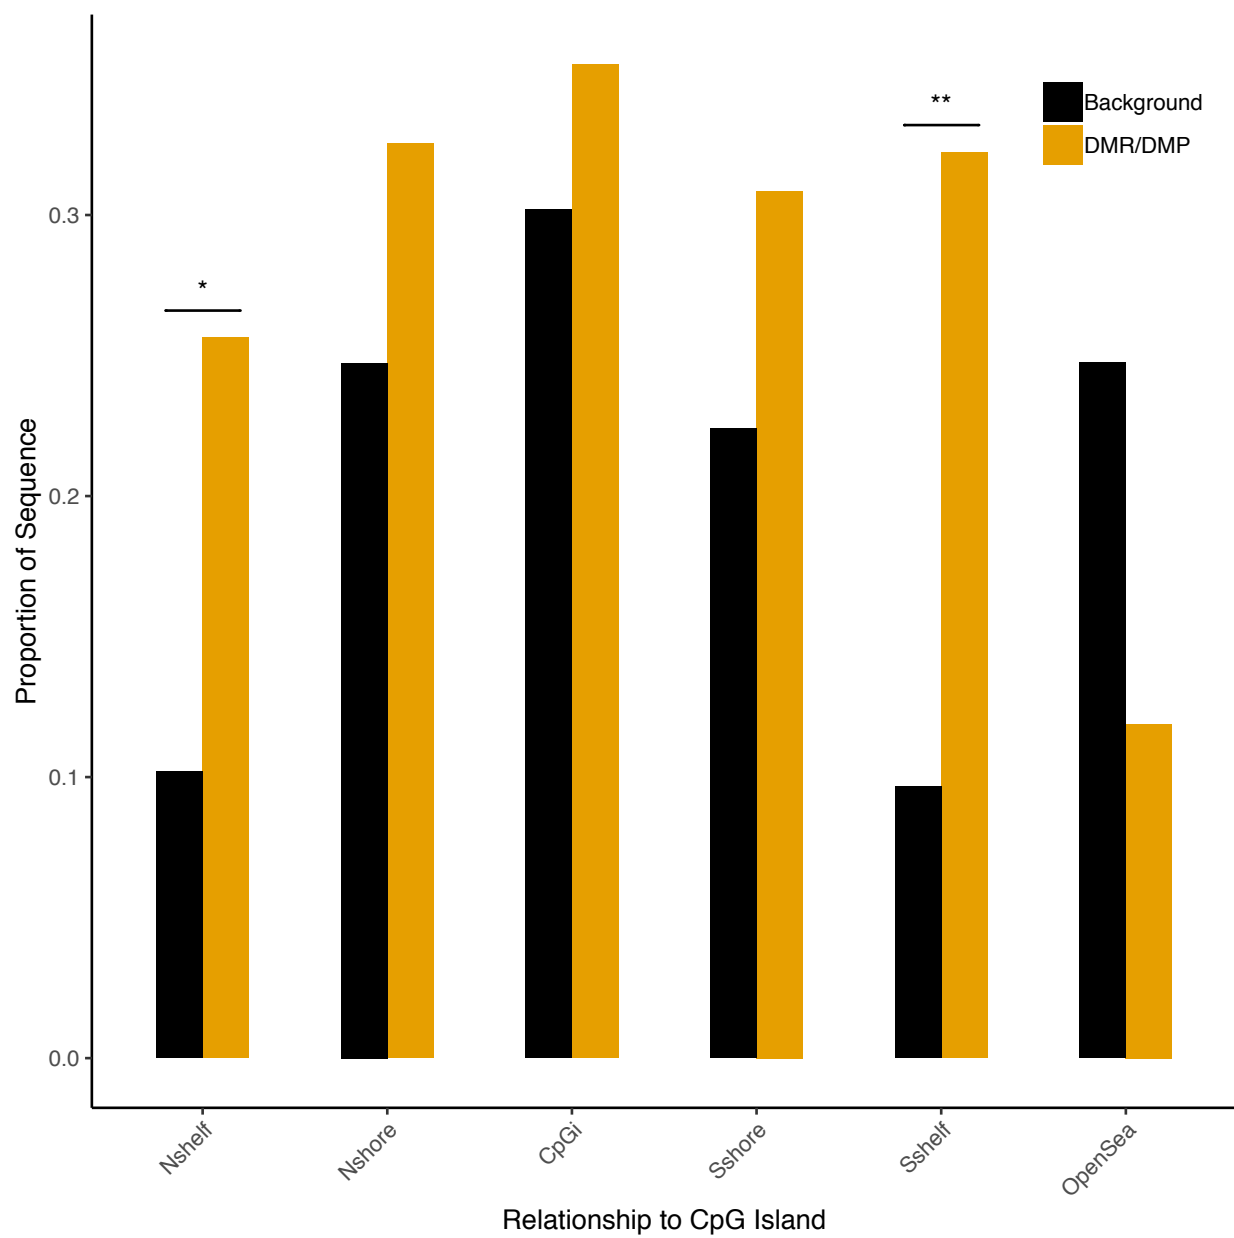



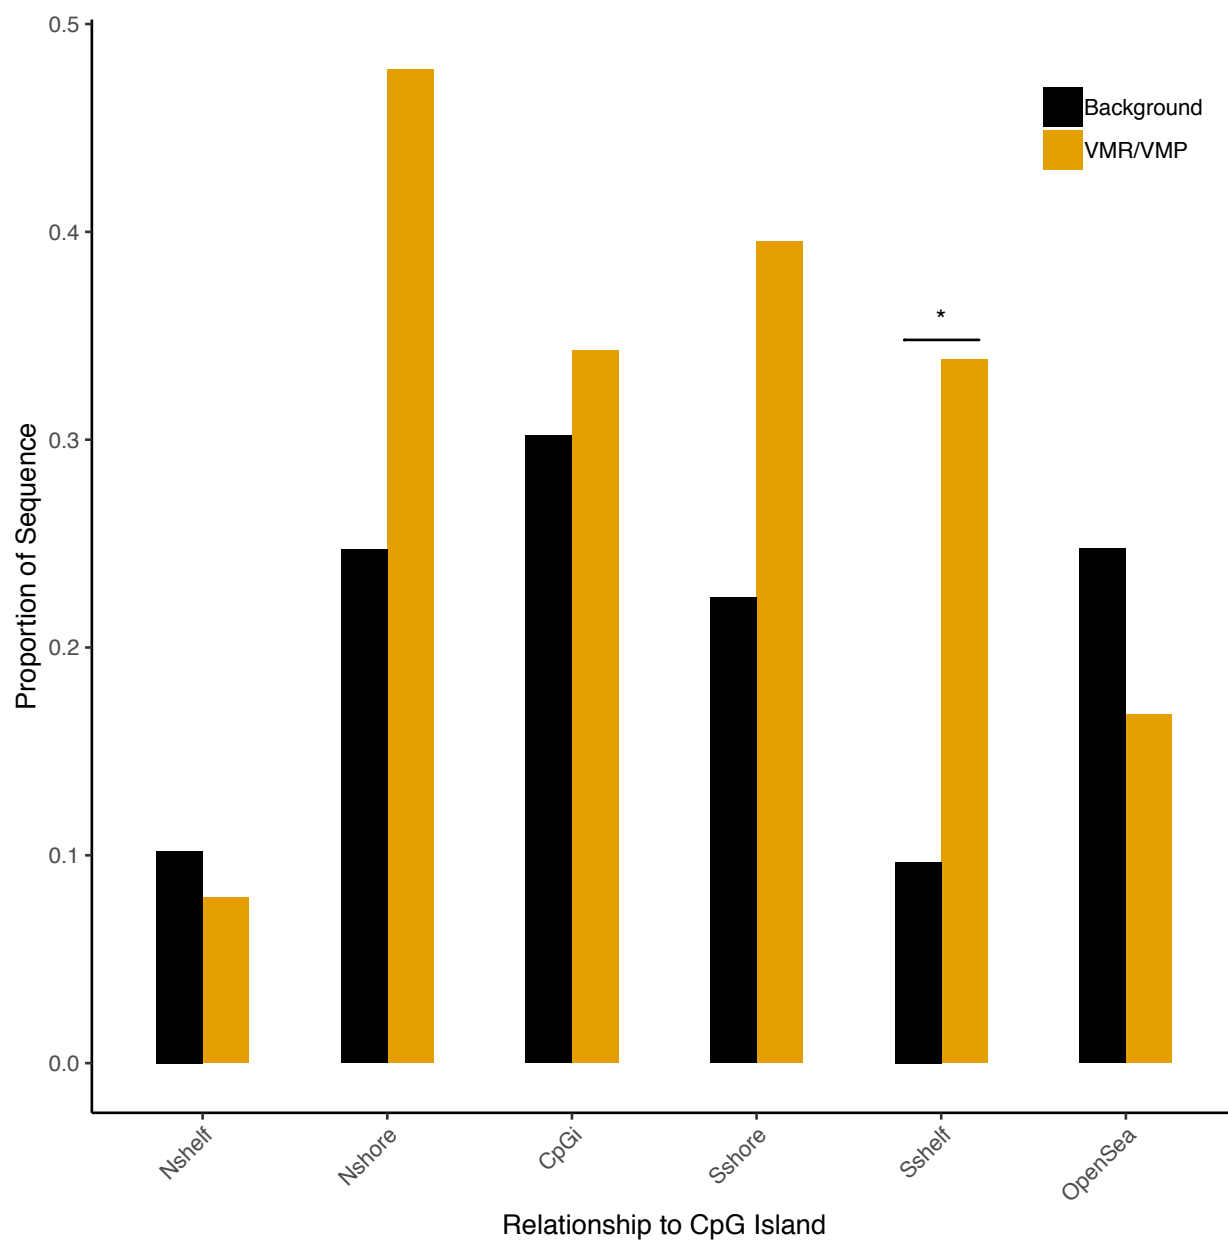

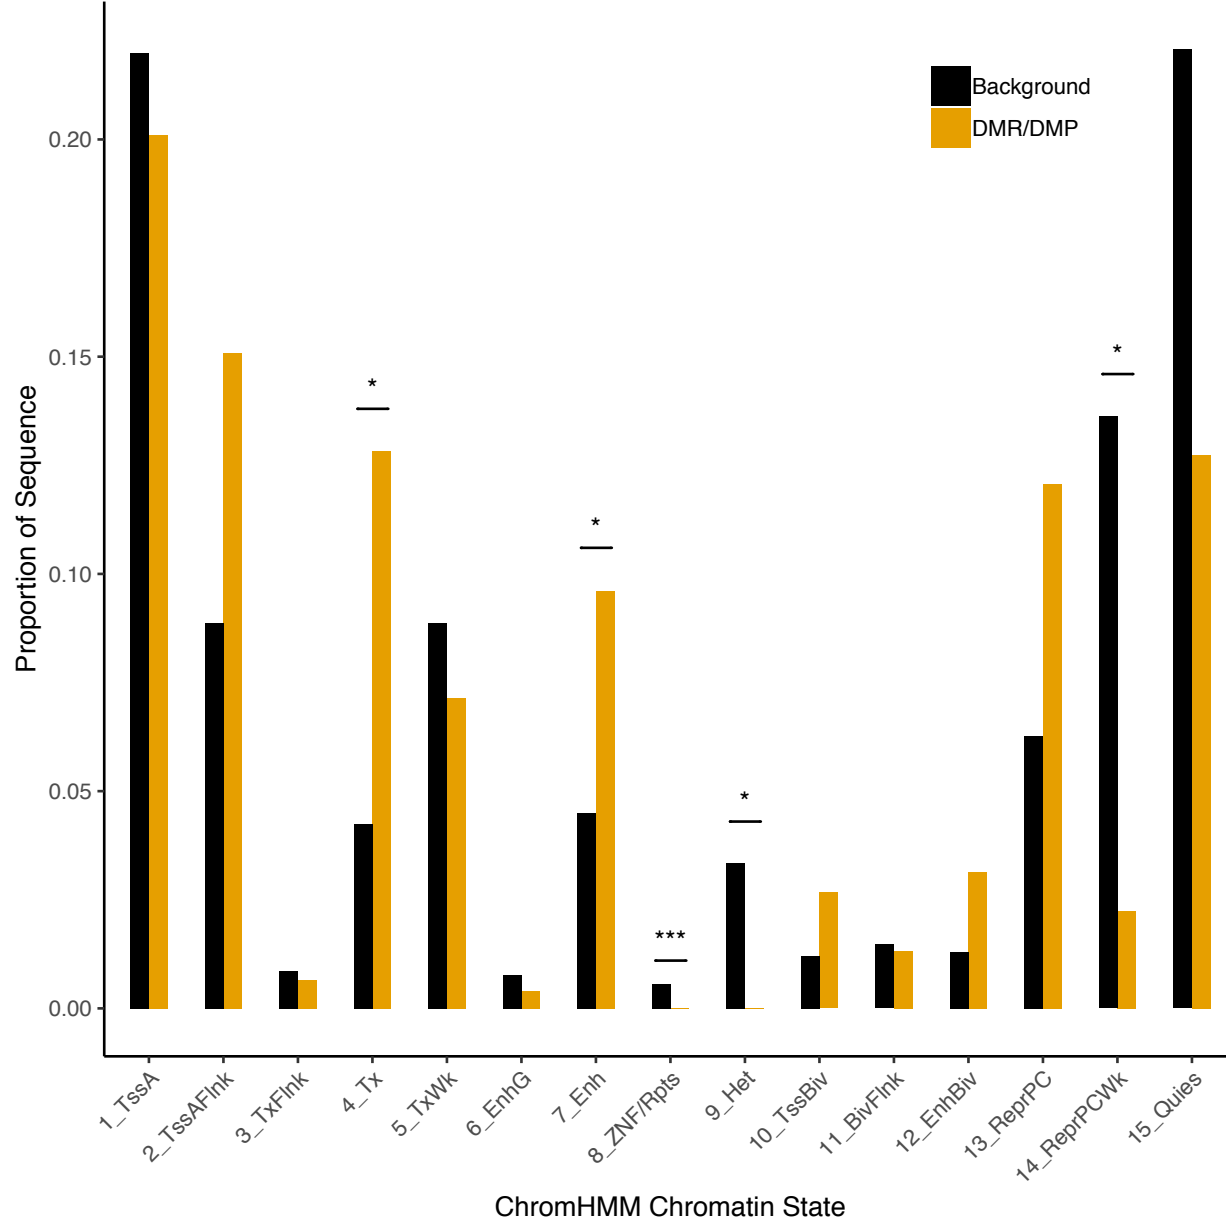



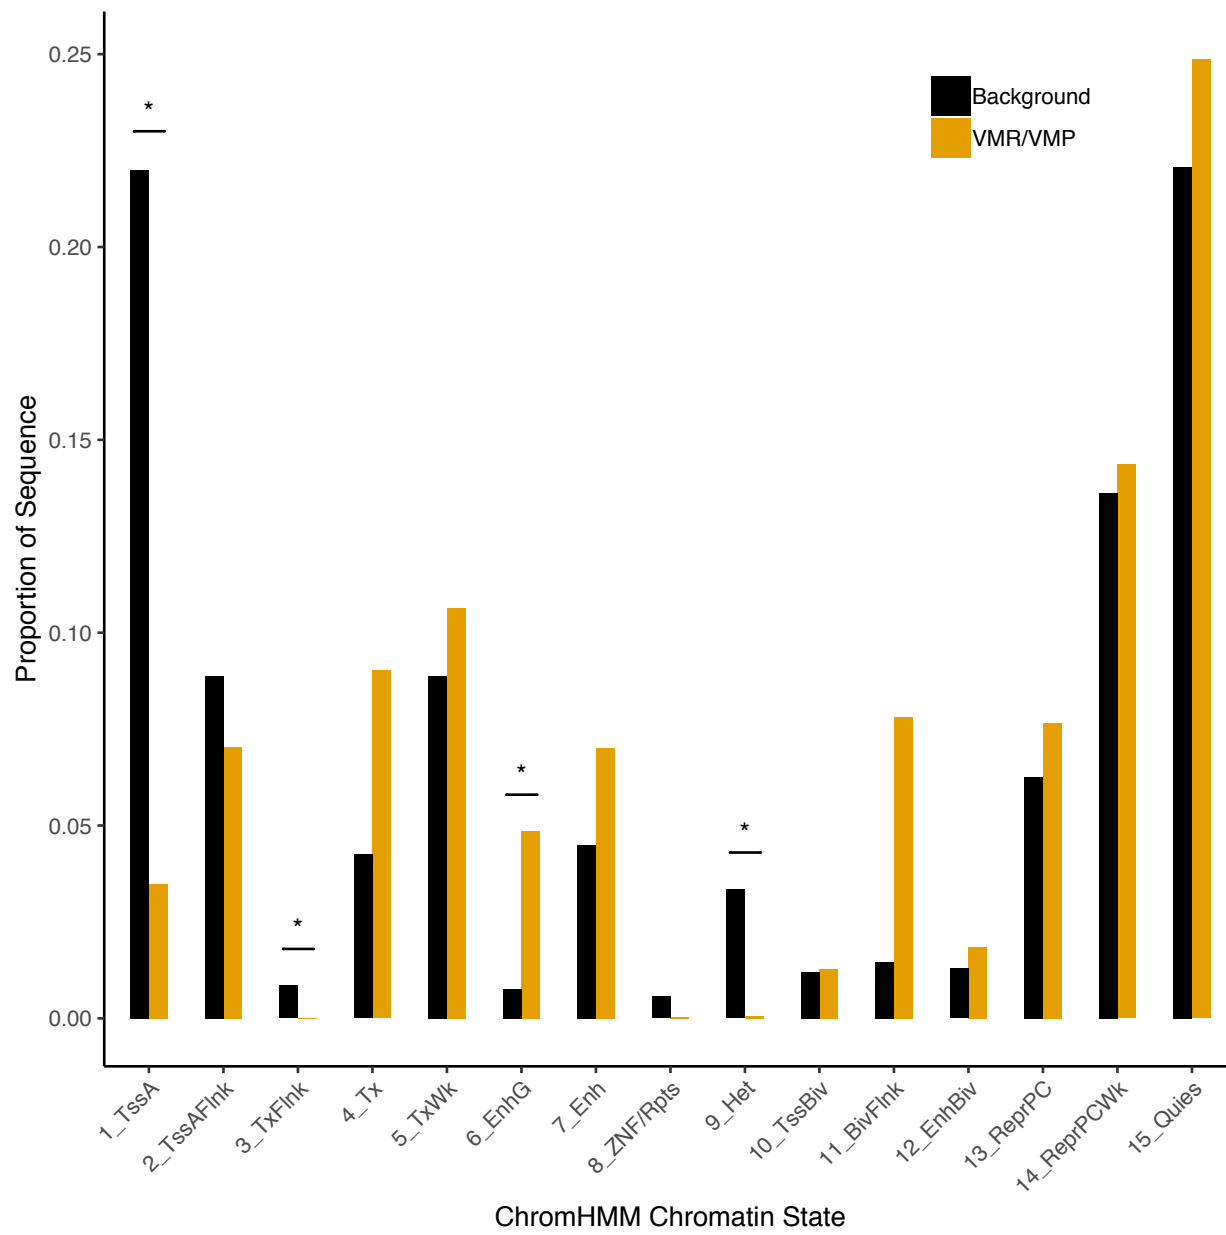

**Supplemental Table 2. DMP significant gene/promoter hits identified in the MD affected versus MD unaffected contrast.**

| entrez    | Symbol     | dmp.gene | dmp.prom |
|-----------|------------|----------|----------|
| 1001      | CDH3       | NA       | 1        |
| 100126332 | MIR943     | NA       | 1        |
| 100129845 | PCOLCE-AS1 | NA       | 1        |
| 100302152 | MIR548N    | 1        | NA       |
| 100422962 | MIR4281    | NA       | 1        |
| 100506866 | TTN-AS1    | 1        | NA       |
| 100526737 | RBM14-RBM4 | 1        | NA       |
| 100528018 | ARL2-SNX15 | 1        | NA       |
| 100616144 | MIR548AN   | 1        | NA       |
| 100616190 | MIR548O2   | 1        | NA       |
| 100616266 | MIR4733    | NA       | 1        |
| 10458     | BAIAP2     | 1        | NA       |
| 10540     | DCTN2      | 1        | 1        |
| 10555     | AGPAT2     | 1        | NA       |
| 10560     | SLC19A2    | 1        | 1        |
| 10642     | IGF2BP1    | 1        | NA       |
| 10659     | CELF2      | 1        | 1        |
| 10718     | NRG3       | 1        | NA       |
| 10981     | RAB32      | 1        | NA       |
| 11167     | FSTL1      | 1        | 1        |
| 117248    | GALNT15    | 1        | NA       |
| 125061    | AFMID      | 1        | 1        |
| 125488    | TTC39C     | 1        | 1        |
| 126917    | IFFO2      | 1        | NA       |
| 133121    | ENPP6      | 1        | NA       |
| 135138    | PACRG      | 1        | NA       |
| 137902    | PXDNL      | 1        | 1        |
| 1456      | CSNK1G3    | 1        | NA       |
| 151278    | CCDC140    | 1        | NA       |
| 153339    | TMEM167A   | NA       | 1        |
| 154043    | CNKSR3     | 1        | NA       |
| 161003    | STOML3     | NA       | 1        |
| 171425    | CLYBL      | 1        | NA       |
| 1745      | DLX1       | 1        | NA       |
| 1876      | E2F6       | NA       | 1        |
| 1877      | E4F1       | 1        | NA       |
| 1880      | GPR183     | NA       | 1        |

|        |            |    |    |
|--------|------------|----|----|
| 2059   | EPS8       | 1  | NA |
| 2070   | EYA4       | 1  | 1  |
| 2173   | FABP7      | 1  | NA |
| 221061 | FAM171A1   | 1  | NA |
| 2256   | FGF11      | NA | 1  |
| 22821  | RASA3      | 1  | NA |
| 22854  | NTNG1      | 1  | NA |
| 22986  | SORCS3     | 1  | NA |
| 23065  | EMC1       | 1  | NA |
| 23108  | RAP1GAP2   | 1  | NA |
| 23150  | FRMD4B     | 1  | NA |
| 23344  | ESYT1      | NA | 1  |
| 23484  | LEPROTL1   | NA | 1  |
| 253314 | EIF4E1B    | NA | 1  |
| 25766  | PRPF40B    | 1  | NA |
| 25782  | RAB3GAP2   | 1  | NA |
| 26034  | IPCEF1     | 1  | NA |
| 26099  | SZRD1      | 1  | NA |
| 27031  | NPHP3      | 1  | NA |
| 27241  | BBS9       | NA | 1  |
| 273    | AMPH       | 1  | NA |
| 28232  | SLCO3A1    | NA | 1  |
| 311    | ANXA11     | NA | 1  |
| 337867 | UBAC2      | 1  | NA |
| 348808 | NPHP3-AS1  | NA | 1  |
| 3595   | IL12RB2    | NA | 1  |
| 390598 | SKOR1      | 1  | NA |
| 3983   | ABLIM1     | 1  | 1  |
| 404663 | LINC01194  | 1  | NA |
| 404665 | CACTIN-AS1 | NA | 1  |
| 4088   | SMAD3      | 1  | NA |
| 4299   | AFF1       | 1  | NA |
| 439990 | LINC00857  | NA | 1  |
| 440695 | ETV3L      | 1  | NA |
| 4430   | MYO1B      | 1  | NA |
| 463    | ZFH3       | 1  | NA |
| 4682   | NUBP1      | NA | 1  |
| 4763   | NF1        | 1  | NA |
| 50515  | CHST11     | NA | 1  |
| 51154  | MRT04      | NA | 1  |

|        |          |    |    |
|--------|----------|----|----|
| 5118   | PCOLCE   | 1  | NA |
| 51527  | GSKIP    | NA | 1  |
| 51760  | SYT17    | NA | 1  |
| 5368   | PNOC     | 1  | NA |
| 54472  | TOLLIP   | 1  | NA |
| 54715  | RBFOX1   | 1  | NA |
| 55002  | TMCO3    | 1  | NA |
| 55076  | TMEM45A  | 1  | NA |
| 55102  | ATG2B    | 1  | NA |
| 574408 | MIR329-1 | NA | 1  |
| 574409 | MIR329-2 | NA | 1  |
| 57451  | TENM2    | 1  | NA |
| 57537  | SORCS2   | 1  | NA |
| 57552  | NCEH1    | 1  | NA |
| 5912   | RAP2B    | 1  | NA |
| 5915   | RARB     | 1  | NA |
| 5936   | RBM4     | NA | 1  |
| 596    | BCL2     | 1  | 1  |
| 64084  | CLSTN2   | 1  | NA |
| 6416   | MAP2K4   | 1  | NA |
| 6423   | SFRP2    | NA | 1  |
| 64478  | CSMD1    | 1  | NA |
| 647288 | CTAGE11P | NA | 1  |
| 6620   | SNCB     | 1  | NA |
| 670    | BPHL     | 1  | NA |
| 6915   | TBXA2R   | 1  | 1  |
| 7083   | TK1      | NA | 1  |
| 7273   | TTN      | 1  | NA |
| 7441   | VPREB1   | NA | 1  |
| 7469   | NELFA    | 1  | 1  |
| 7518   | XRCC4    | 1  | 1  |
| 752    | FMNL1    | 1  | NA |
| 7520   | XRCC5    | 1  | 1  |
| 768212 | MIR758   | 1  | 1  |
| 7813   | EVI5     | 1  | NA |
| 79570  | NKAIN1   | 1  | NA |
| 79740  | ZBBX     | NA | 1  |
| 80028  | FBXL18   | 1  | NA |
| 80331  | DNAJC5   | 1  | NA |
| 84717  | HDGFL2   | NA | 1  |

|       |           |    |    |
|-------|-----------|----|----|
| 84892 | POMGNT2   | 1  | 1  |
| 84953 | MICALCL   | NA | 1  |
| 8802  | SUCLG1    | 1  | 1  |
| 8817  | FGF18     | NA | 1  |
| 8874  | ARHGEF7   | 1  | NA |
| 8924  | HERC2     | 1  | NA |
| 91522 | COL23A1   | NA | 1  |
| 92181 | UBTD2     | 1  | NA |
| 9276  | COPB2     | NA | 1  |
| 9496  | TBX4      | 1  | 1  |
| 9671  | WSCD2     | NA | 1  |
| 9727  | RAB11FIP3 | 1  | NA |
| 9844  | ELMO1     | 1  | 1  |
| 995   | CDC25C    | 1  | 1  |

---

**Supplemental Table 3. VMP significant gene/promoter hits identified in the MD affected versus MD unaffected contrast.**

| entrez    | symbol         | vmp.gene | vmp.prom |
|-----------|----------------|----------|----------|
| 100128264 | HTR5A-AS1      | 1        | NA       |
| 100128568 | LOC100128568   | 1        | NA       |
| 100131213 | ZNF503-AS2     | 1        | 1        |
| 100132406 | NBPF10         | 1        | NA       |
| 100132677 | BSN-DT         | 1        | 1        |
| 100133612 | LINC01134      | 1        | NA       |
| 100189589 | DCTN1-AS1      | 1        | NA       |
| 100271715 | ARHGEF33       | 1        | NA       |
| 100288142 | NBPF20         | 1        | NA       |
| 100302197 | MIR1306        | NA       | 1        |
| 100302224 | MIR2110        | NA       | 1        |
| 100316904 | SAP25          | 1        | NA       |
| 1004      | CDH6           | 1        | NA       |
| 100500860 | MIR3618        | NA       | 1        |
| 100526835 | FPGT-TNNI3K    | 1        | NA       |
| 100529261 | CHURC1-FNTB    | 1        | NA       |
| 100532732 | MSH5-SAPCD1    | NA       | 1        |
| 100533179 | UBE2F-SCLY     | NA       | 1        |
| 100533184 | ARHGAP19-SLIT1 | 1        | NA       |
| 100534589 | HOXA10-HOXA9   | 1        | NA       |
| 100616250 | MIR3960        | 1        | 1        |
| 10142     | AKAP9          | NA       | 1        |
| 10172     | ZNF256         | NA       | 1        |
| 10194     | TSHZ1          | NA       | 1        |
| 10195     | ALG3           | NA       | 1        |
| 102       | ADAM10         | 1        | NA       |
| 10201     | NME6           | 1        | NA       |
| 10207     | PATJ           | 1        | NA       |
| 10217     | CTDSPL         | 1        | NA       |
| 1025      | CDK9           | NA       | 1        |
| 10351     | ABCA8          | 1        | NA       |
| 10480     | EIF3M          | 1        | 1        |
| 10499     | NCOA2          | 1        | NA       |
| 10500     | SEMA6C         | NA       | 1        |
| 10516     | FBLN5          | 1        | 1        |
| 10522     | DEAF1          | 1        | NA       |
| 10557     | RPP38          | 1        | NA       |

|        |          |    |    |
|--------|----------|----|----|
| 10667  | FARS2    | 1  | NA |
| 10693  | CCT6B    | 1  | NA |
| 10938  | EHD1     | 1  | 1  |
| 11100  | HNRNPUL1 | 1  | 1  |
| 11122  | PTPRT    | 1  | NA |
| 11129  | CLASRP   | 1  | NA |
| 11176  | BAZ2A    | 1  | 1  |
| 11211  | FZD10    | NA | 1  |
| 11277  | TREX1    | 1  | 1  |
| 113091 | PTH2     | 1  | NA |
| 113791 | PIK3IP1  | 1  | 1  |
| 1141   | CHRNA2   | 1  | NA |
| 114815 | SORCS1   | 1  | NA |
| 114818 | KLHL29   | 1  | 1  |
| 114827 | FHAD1    | 1  | NA |
| 115817 | DHRS1    | NA | 1  |
| 116729 | PPP1R27  | 1  | NA |
| 116987 | AGAP1    | 1  | NA |
| 118424 | UBE2J2   | 1  | NA |
| 1186   | CLCN7    | 1  | NA |
| 1213   | CLTC     | NA | 1  |
| 124093 | CCDC78   | NA | 1  |
| 124401 | ANKS3    | 1  | NA |
| 124637 | CYB5D1   | 1  | NA |
| 1262   | CNGA4    | NA | 1  |
| 126374 | WTIP     | NA | 1  |
| 126868 | MAB21L3  | NA | 1  |
| 1284   | COL4A2   | 1  | NA |
| 129293 | TRABD2A  | NA | 1  |
| 129787 | TMEM18   | 1  | 1  |
| 131566 | DCBLD2   | 1  | 1  |
| 131965 | METTL6   | 1  | 1  |
| 132    | ADK      | NA | 1  |
| 132851 | SPATA4   | 1  | 1  |
| 133015 | PACRGL   | 1  | NA |
| 134121 | C5orf49  | 1  | NA |
| 134145 | FAM173B  | NA | 1  |
| 1364   | CLDN4    | NA | 1  |
| 1369   | CPN1     | 1  | NA |
| 1395   | CRHR2    | 1  | NA |

|        |           |    |    |
|--------|-----------|----|----|
| 140739 | UBE2F     | NA | 1  |
| 140828 | LINC00261 | 1  | NA |
| 144481 | SOCS2-AS1 | NA | 1  |
| 1446   | CSN1S1    | 1  | 1  |
| 144699 | FBXL14    | NA | 1  |
| 145376 | PPP1R36   | 1  | 1  |
| 146050 | ZSCAN29   | NA | 1  |
| 146712 | B3GNTL1   | 1  | NA |
| 148014 | TTC9B     | NA | 1  |
| 148362 | BROX      | 1  | 1  |
| 148398 | SAMD11    | 1  | 1  |
| 148741 | ANKRD35   | 1  | NA |
| 148753 | FAM163A   | 1  | 1  |
| 149233 | IL23R     | 1  | NA |
| 150538 | SATB2-AS1 | 1  | NA |
| 152992 | TRMT44    | 1  | 1  |
| 153090 | DAB2IP    | 1  | NA |
| 153768 | PRELID2   | NA | 1  |
| 1592   | CYP26A1   | 1  | 1  |
| 1613   | DAPK3     | 1  | 1  |
| 161424 | NOP9      | NA | 1  |
| 162461 | TMEM92    | NA | 1  |
| 1639   | DCTN1     | 1  | NA |
| 168090 | C6orf118  | 1  | NA |
| 1838   | DTNB      | 1  | NA |
| 1850   | DUSP8     | NA | 1  |
| 1854   | DUT       | NA | 1  |
| 1890   | TYMP      | 1  | 1  |
| 199990 | FAAP20    | 1  | NA |
| 2000   | ELF4      | NA | 1  |
| 2003   | ELK2AP    | 1  | NA |
| 200424 | TET3      | 1  | NA |
| 201514 | ZNF584    | 1  | 1  |
| 2035   | EPB41     | 1  | NA |
| 2048   | EPHB2     | 1  | NA |
| 204851 | HIPK1     | 1  | 1  |
| 210    | ALAD      | NA | 1  |
| 2104   | ESRRG     | 1  | NA |
| 2120   | ETV6      | NA | 1  |
| 2130   | EWSR1     | 1  | 1  |



|        |           |    |    |
|--------|-----------|----|----|
| 219670 | ENKUR     | 1  | 1  |
| 220064 | ORAOV1    | NA | 1  |
| 220359 | TIGD3     | 1  | 1  |
| 221060 | C10orf111 | NA | 1  |
| 221150 | SKA3      | 1  | NA |
| 221178 | SPATA13   | 1  | NA |
| 222643 | UNC5CL    | 1  | 1  |
| 225    | ABCD2     | 1  | 1  |
| 2253   | FGF8      | 1  | NA |
| 22801  | ITGA11    | 1  | NA |
| 22848  | AAK1      | 1  | NA |
| 22889  | KHDC4     | 1  | 1  |
| 22906  | TRAK1     | 1  | 1  |
| 22928  | SEPHS2    | 1  | 1  |
| 22948  | CCT5      | 1  | NA |
| 22950  | SLC4A1AP  | 1  | 1  |
| 22996  | TTC39A    | 1  | NA |
| 23001  | WDFY3     | 1  | NA |
| 23033  | DOPEY1    | NA | 1  |
| 23126  | POGZ      | 1  | NA |
| 23143  | LRCH1     | 1  | NA |
| 23179  | RGL1      | 1  | NA |
| 23191  | CYFIP1    | NA | 1  |
| 23208  | SYT11     | 1  | NA |
| 2326   | FMO1      | 1  | NA |
| 23266  | ADGRL2    | 1  | NA |
| 2327   | FMO2      | 1  | NA |
| 23294  | ANKS1A    | 1  | NA |
| 23303  | KIF13B    | 1  | NA |
| 23312  | DMXL2     | 1  | NA |
| 23314  | SATB2     | NA | 1  |
| 23329  | TBC1D30   | NA | 1  |
| 23352  | UBR4      | NA | 1  |
| 23353  | SUN1      | 1  | NA |
| 23378  | RRP8      | NA | 1  |
| 23406  | COTL1     | 1  | NA |
| 2342   | FNTB      | NA | 1  |
| 23432  | GPR161    | 1  | 1  |
| 23492  | CBX7      | NA | 1  |
| 23554  | TSPAN12   | NA | 1  |

|        |           |    |    |
|--------|-----------|----|----|
| 23705  | CADM1     | 1  | NA |
| 238    | ALK       | 1  | NA |
| 24142  | NAT6      | 1  | 1  |
| 254394 | MCM9      | 1  | 1  |
| 2548   | GAA       | 1  | NA |
| 256356 | GK5       | NA | 1  |
| 25807  | RHBDD3    | NA | 1  |
| 259217 | HSPA12A   | 1  | NA |
| 25939  | SAMHD1    | NA | 1  |
| 25941  | TPGS2     | 1  | NA |
| 25956  | SEC31B    | 1  | NA |
| 26057  | ANKRD17   | 1  | NA |
| 26092  | TOR1AIP1  | 1  | NA |
| 26119  | LDLRAP1   | 1  | NA |
| 26136  | TES       | 1  | NA |
| 26207  | PITPNC1   | 1  | NA |
| 26520  | TIMM9     | 1  | NA |
| 26801  | SNORD48   | NA | 1  |
| 26828  | RNU5F-1   | 1  | NA |
| 26974  | ZNF285    | NA | 1  |
| 26985  | AP3M1     | NA | 1  |
| 26995  | TRUB2     | NA | 1  |
| 271    | AMPD2     | 1  | 1  |
| 27102  | EIF2AK1   | 1  | NA |
| 27229  | TUBGCP4   | NA | 1  |
| 27237  | ARHGEF16  | 1  | NA |
| 27243  | CHMP2A    | NA | 1  |
| 27255  | CNTN6     | 1  | NA |
| 27327  | TNRC6A    | 1  | 1  |
| 27346  | TMEM97    | NA | 1  |
| 2774   | GNAL      | 1  | NA |
| 2788   | GNG7      | 1  | NA |
| 283102 | KRT8P41   | NA | 1  |
| 283554 | GPR137C   | NA | 1  |
| 283856 | LOC283856 | 1  | NA |
| 284069 | FAM171A2  | NA | 1  |
| 284098 | PIGW      | 1  | NA |
| 284273 | ZADH2     | 1  | NA |
| 284352 | PPP1R37   | NA | 1  |
| 285116 | AHCTF1P1  | 1  | NA |

|        |            |    |    |
|--------|------------|----|----|
| 28514  | DLL1       | 1  | NA |
| 285590 | SH3PXD2B   | 1  | NA |
| 285593 | LOC285593  | 1  | NA |
| 2895   | GRID2      | 1  | NA |
| 28974  | C19orf53   | 1  | NA |
| 2900   | GRIK4      | 1  | NA |
| 2918   | GRM8       | 1  | 1  |
| 29993  | PACSLN1    | NA | 1  |
| 3084   | NRG1       | 1  | NA |
| 3092   | HIP1       | 1  | NA |
| 3106   | HLA-B      | NA | 1  |
| 3148   | HMGB2      | NA | 1  |
| 317751 | MESTIT1    | NA | 1  |
| 3185   | HNRNPF     | 1  | 1  |
| 3205   | HOXA9      | 1  | NA |
| 321    | APBA2      | 1  | NA |
| 330    | BIRC3      | NA | 1  |
| 334    | APLP2      | NA | 1  |
| 3361   | HTR5A      | 1  | NA |
| 337968 | KRTAP6-3   | NA | 1  |
| 338651 | KRTAP5-AS1 | 1  | 1  |
| 339    | APOBEC1    | 1  | NA |
| 339416 | ANKRD45    | 1  | NA |
| 342977 | NANOS3     | 1  | NA |
| 343099 | CCDC18     | 1  | NA |
| 347689 | SOX2-OT    | 1  | NA |
| 348262 | MCRIP1     | NA | 1  |
| 350383 | GPR142     | NA | 1  |
| 3611   | ILK        | 1  | 1  |
| 3678   | ITGA5      | 1  | 1  |
| 3707   | ITPKB      | 1  | NA |
| 3720   | JARID2     | 1  | 1  |
| 3748   | KCNC3      | 1  | 1  |
| 374928 | ZNF773     | NA | 1  |
| 375033 | PEAR1      | 1  | NA |
| 375196 | LOC375196  | NA | 1  |
| 375387 | NRROS      | 1  | NA |
| 376267 | RAB15      | NA | 1  |
| 376497 | SLC27A1    | 1  | NA |
| 3784   | KCNQ1      | 1  | NA |

|        |          |    |    |
|--------|----------|----|----|
| 38     | ACAT1    | 1  | 1  |
| 388394 | RPRML    | NA | 1  |
| 389337 | ARHGEF37 | NA | 1  |
| 390010 | NKX1-2   | 1  | NA |
| 3930   | LBR      | NA | 1  |
| 3932   | LCK      | 1  | NA |
| 399665 | FAM102A  | 1  | 1  |
| 4004   | LMO1     | 1  | 1  |
| 401145 | CCSER1   | 1  | 1  |
| 401898 | ZNF833P  | 1  | NA |
| 404093 | CUEDC1   | NA | 1  |
| 407015 | MIR26A1  | NA | 1  |
| 4148   | MATN3    | NA | 1  |
| 4176   | MCM7     | 1  | NA |
| 4223   | MEOX2    | 1  | NA |
| 4232   | MEST     | 1  | 1  |
| 4240   | MFGE8    | 1  | NA |
| 4297   | KMT2A    | NA | 1  |
| 4329   | ALDH6A1  | NA | 1  |
| 440119 | FZD10-DT | 1  | NA |
| 4430   | MYO1B    | 1  | NA |
| 475    | ATOX1    | NA | 1  |
| 4750   | NEK1     | 1  | 1  |
| 4782   | NFIC     | 1  | 1  |
| 4901   | NRL      | 1  | NA |
| 4919   | ROR1     | NA | 1  |
| 494326 | MIR377   | NA | 1  |
| 49854  | ZBTB21   | NA | 1  |
| 5045   | FURIN    | 1  | NA |
| 50804  | MYEF2    | 1  | 1  |
| 5081   | PAX7     | NA | 1  |
| 50836  | TAS2R8   | NA | 1  |
| 50854  | C6orf48  | NA | 1  |
| 50940  | PDE11A   | 1  | 1  |
| 50999  | TMED5    | NA | 1  |
| 51019  | WASHC3   | NA | 1  |
| 51069  | MRPL2    | 1  | 1  |
| 51086  | TNNI3K   | 1  | NA |
| 51117  | COQ4     | 1  | NA |
| 51160  | VPS28    | NA | 1  |

|        |           |    |    |
|--------|-----------|----|----|
| 51161  | C3orf18   | NA | 1  |
| 51188  | SS18L2    | NA | 1  |
| 51191  | HERC5     | 1  | 1  |
| 51334  | PRR16     | 1  | NA |
| 51373  | MRPS17    | NA | 1  |
| 51409  | HEMK1     | 1  | NA |
| 51430  | SUCO      | NA | 1  |
| 5158   | PDE6B     | 1  | NA |
| 5159   | PDGFRB    | NA | 1  |
| 51593  | SRRT      | NA | 1  |
| 51701  | NLK       | 1  | NA |
| 5217   | PFN2      | 1  | 1  |
| 523    | ATP6V1A   | 1  | 1  |
| 5295   | PIK3R1    | 1  | 1  |
| 53343  | NUDT9     | NA | 1  |
| 5356   | PLRG1     | NA | 1  |
| 5359   | PLSCR1    | NA | 1  |
| 5365   | PLXNB3    | 1  | NA |
| 54434  | SSH1      | 1  | 1  |
| 54487  | DGCR8     | 1  | 1  |
| 54502  | RBM47     | 1  | NA |
| 54503  | ZDHHC13   | NA | 1  |
| 54758  | KLHDC4    | 1  | NA |
| 54795  | TRPM4     | 1  | NA |
| 54811  | ZNF562    | NA | 1  |
| 54897  | CASZ1     | 1  | NA |
| 54940  | OCIAD1    | NA | 1  |
| 55033  | FKBP14    | NA | 1  |
| 55036  | CCDC40    | 1  | NA |
| 55062  | WIP1      | 1  | NA |
| 55068  | ENOX1     | 1  | NA |
| 55088  | CCDC186   | NA | 1  |
| 55114  | ARHGAP17  | 1  | 1  |
| 55127  | HEATR1    | NA | 1  |
| 55159  | RFWD3     | NA | 1  |
| 55160  | ARHGEF10L | 1  | NA |
| 55276  | PGM2      | 1  | NA |
| 55283  | MCOLN3    | NA | 1  |
| 553103 | MIR3936HG | 1  | 1  |
| 55315  | SLC29A3   | NA | 1  |

|       |            |    |    |
|-------|------------|----|----|
| 55336 | FBXL8      | 1  | 1  |
| 55361 | PI4K2A     | 1  | 1  |
| 55532 | SLC30A10   | 1  | NA |
| 55611 | OTUB1      | NA | 1  |
| 5562  | PRKAA1     | NA | 1  |
| 55635 | DEPDC1     | 1  | 1  |
| 5575  | PRKAR1B    | 1  | NA |
| 55758 | RCOR3      | 1  | NA |
| 55790 | CSGALNACT1 | NA | 1  |
| 55819 | RNF130     | 1  | 1  |
| 55854 | ZC3H15     | NA | 1  |
| 55902 | ACSS2      | 1  | 1  |
| 55924 | FAM212B    | 1  | NA |
| 56005 | MYDGF      | 1  | 1  |
| 56134 | PCDHAC2    | 1  | 1  |
| 56135 | PCDHAC1    | 1  | NA |
| 56136 | PCDHA13    | 1  | NA |
| 56137 | PCDHA12    | 1  | NA |
| 56138 | PCDHA11    | 1  | NA |
| 56139 | PCDHA10    | 1  | NA |
| 56140 | PCDHA8     | 1  | NA |
| 56141 | PCDHA7     | 1  | NA |
| 56142 | PCDHA6     | 1  | NA |
| 56143 | PCDHA5     | 1  | NA |
| 56144 | PCDHA4     | 1  | NA |
| 56145 | PCDHA3     | 1  | NA |
| 56146 | PCDHA2     | 1  | NA |
| 56147 | PCDHA1     | 1  | NA |
| 56474 | CTPS2      | NA | 1  |
| 56704 | JPH1       | NA | 1  |
| 56853 | CELF4      | 1  | NA |
| 5687  | PSMA6      | NA | 1  |
| 56886 | UGGT1      | 1  | 1  |
| 56937 | PMEPA1     | 1  | NA |
| 56950 | SMYD2      | 1  | NA |
| 57030 | SLC17A7    | 1  | 1  |
| 57132 | CHMP1B     | 1  | 1  |
| 57150 | SMIM8      | 1  | NA |
| 57209 | ZNF248     | 1  | NA |
| 57337 | SENP7      | NA | 1  |

|        |           |    |    |
|--------|-----------|----|----|
| 57348  | TTYH1     | 1  | NA |
| 57379  | AICDA     | 1  | NA |
| 574481 | MIR521-2  | NA | 1  |
| 57474  | ZNF490    | 1  | NA |
| 57513  | CASKIN2   | 1  | NA |
| 57536  | KIAA1328  | NA | 1  |
| 57544  | TXNDC16   | NA | 1  |
| 57553  | MICAL3    | 1  | NA |
| 57556  | SEMA6A    | NA | 1  |
| 57569  | ARHGAP20  | 1  | 1  |
| 57575  | PCDH10    | NA | 1  |
| 57582  | KCNT1     | 1  | NA |
| 57620  | STIM2     | 1  | NA |
| 57654  | UVSSA     | 1  | NA |
| 57666  | FBRSL1    | 1  | NA |
| 57693  | ZNF317    | 1  | NA |
| 57758  | SCUBE2    | NA | 1  |
| 5789   | PTPRD     | 1  | NA |
| 5793   | PTPRG     | 1  | NA |
| 5816   | PVALB     | 1  | 1  |
| 583    | BBS2      | NA | 1  |
| 5832   | ALDH18A1  | 1  | 1  |
| 5977   | DPF2      | NA | 1  |
| 5990   | RFX2      | 1  | NA |
| 5993   | RFX5      | NA | 1  |
| 6095   | RORA      | 1  | NA |
| 619343 | NA        | 1  | NA |
| 6262   | RYR2      | 1  | NA |
| 63027  | SLC22A23  | NA | 1  |
| 6329   | SCN4A     | NA | 1  |
| 639    | PRDM1     | NA | 1  |
| 63976  | PRDM16    | 1  | NA |
| 642366 | LOC642366 | 1  | NA |
| 64328  | XPO4      | 1  | 1  |
| 64377  | CHST8     | 1  | NA |
| 643803 | KRTAP24-1 | 1  | NA |
| 64478  | CSMD1     | 1  | NA |
| 646903 | LOC646903 | NA | 1  |
| 64746  | ACBD3     | NA | 1  |
| 64786  | TBC1D15   | NA | 1  |

|        |           |    |    |
|--------|-----------|----|----|
| 64853  | AIDA      | NA | 1  |
| 64881  | PCDH20    | 1  | NA |
| 64919  | BCL11B    | NA | 1  |
| 6497   | SKI       | 1  | NA |
| 65012  | SLC26A10  | NA | 1  |
| 65108  | MARCKSL1  | NA | 1  |
| 6514   | SLC2A2    | NA | 1  |
| 652276 | LOC652276 | NA | 1  |
| 6584   | SLC22A5   | NA | 1  |
| 6585   | SLIT1     | NA | 1  |
| 6588   | SLN       | NA | 1  |
| 65985  | AACS      | 1  | 1  |
| 65996  | CENPBD1P1 | 1  | NA |
| 66005  | CHID1     | NA | 1  |
| 6604   | SMARCD3   | 1  | NA |
| 6631   | SNRPC     | 1  | 1  |
| 6648   | SOD2      | 1  | NA |
| 6687   | SPG7      | 1  | 1  |
| 6788   | STK3      | 1  | NA |
| 6865   | TACR2     | 1  | NA |
| 6867   | TACC1     | 1  | 1  |
| 6892   | TAPBP     | NA | 1  |
| 6904   | TBCD      | 1  | 1  |
| 693220 | MIR635    | NA | 1  |
| 699    | BUB1      | 1  | NA |
| 7003   | TEAD1     | 1  | NA |
| 7020   | TFAP2A    | 1  | NA |
| 7025   | NR2F1     | 1  | 1  |
| 7068   | THRB      | 1  | NA |
| 7077   | TIMP2     | 1  | NA |
| 715    | C1R       | 1  | NA |
| 7164   | TPD52L1   | 1  | 1  |
| 7226   | TRPM2     | 1  | 1  |
| 7262   | PHLDA2    | NA | 1  |
| 7277   | TUBA4A    | 1  | NA |
| 728192 | LINC00460 | 1  | NA |
| 728912 | NA        | 1  | NA |
| 728932 | NA        | 1  | NA |
| 728939 | NA        | 1  | NA |
| 7323   | UBE2D3    | 1  | NA |



|       |          |    |    |
|-------|----------|----|----|
| 7342  | UBP1     | 1  | 1  |
| 7444  | VRK2     | 1  | NA |
| 747   | DAGLA    | NA | 1  |
| 7520  | XRCC5    | 1  | NA |
| 768   | CA9      | 1  | NA |
| 773   | CACNA1A  | 1  | NA |
| 7771  | ZNF112   | NA | 1  |
| 78988 | MRPL57   | NA | 1  |
| 79018 | GID4     | 1  | NA |
| 79087 | ALG12    | NA | 1  |
| 7915  | ALDH5A1  | 1  | NA |
| 79174 | CRELD2   | 1  | 1  |
| 79696 | ZC2HC1C  | NA | 1  |
| 79703 | C11orf80 | 1  | NA |
| 79745 | CLIP4    | 1  | 1  |
| 79791 | FBXO31   | 1  | NA |
| 79812 | MMRN2    | 1  | NA |
| 79832 | QSER1    | 1  | NA |
| 79890 | RIN3     | NA | 1  |
| 79896 | THNSL1   | NA | 1  |
| 79913 | ACTR5    | 1  | NA |
| 79918 | SETD6    | 1  | NA |
| 79919 | C2orf54  | 1  | NA |
| 79960 | JADE1    | 1  | NA |
| 79977 | GRHL2    | 1  | NA |
| 80005 | DOCK5    | 1  | NA |
| 8001  | GLRA3    | NA | 1  |
| 80086 | TUBA4B   | NA | 1  |
| 80125 | CCDC33   | 1  | NA |
| 80176 | SPSB1    | 1  | NA |
| 8021  | NUP214   | 1  | NA |
| 80218 | NAA50    | NA | 1  |
| 8022  | LHX3     | 1  | NA |
| 80312 | TET1     | 1  | NA |
| 80728 | ARHGAP39 | NA | 1  |
| 80760 | ITIH5    | 1  | 1  |
| 81029 | WNT5B    | 1  | NA |
| 81532 | MOB2     | 1  | NA |
| 8174  | MADCAM1  | 1  | NA |
| 8310  | ACOX3    | 1  | 1  |

|       |           |    |    |
|-------|-----------|----|----|
| 83538 | TTC25     | NA | 1  |
| 83659 | TEKT1     | NA | 1  |
| 8369  | HIST1H4G  | 1  | 1  |
| 8372  | HYAL3     | 1  | 1  |
| 83943 | IMMP2L    | 1  | NA |
| 84033 | OBSCN     | 1  | NA |
| 84056 | KATNAL1   | 1  | NA |
| 84067 | FAM160A2  | NA | 1  |
| 84068 | SLC10A7   | NA | 1  |
| 84080 | ENKD1     | 1  | NA |
| 84126 | ATRIP     | 1  | 1  |
| 84166 | NLRC5     | 1  | NA |
| 84236 | RHBDD1    | 1  | NA |
| 84264 | HAGHL     | 1  | NA |
| 84272 | YIPF4     | NA | 1  |
| 84284 | NTPCR     | NA | 1  |
| 84302 | TMEM246   | NA | 1  |
| 84316 | NAA38     | NA | 1  |
| 84435 | ADGRA1    | NA | 1  |
| 8460  | TPST1     | NA | 1  |
| 8470  | SORBS2    | 1  | 1  |
| 84725 | PLEKHA8   | 1  | 1  |
| 84856 | LINC00839 | 1  | 1  |
| 84858 | ZNF503    | NA | 1  |
| 84929 | FIBCD1    | 1  | NA |
| 8495  | PPFIBP2   | 1  | NA |
| 85001 | MGC16275  | 1  | NA |
| 8532  | CPZ       | 1  | NA |
| 8536  | CAMK1     | NA | 1  |
| 85403 | EGF1      | NA | 1  |
| 857   | CAV1      | 1  | 1  |
| 8601  | RGS20     | 1  | NA |
| 864   | RUNX3     | 1  | NA |
| 8661  | EIF3A     | 1  | NA |
| 8664  | EIF3D     | NA | 1  |
| 8677  | STX10     | NA | 1  |
| 8717  | TRADD     | NA | 1  |
| 8736  | MYOM1     | 1  | NA |
| 8775  | NAPA      | NA | 1  |
| 8835  | SOCS2     | 1  | 1  |

|       |          |    |    |
|-------|----------|----|----|
| 8927  | BSN      | NA | 1  |
| 894   | CCND2    | NA | 1  |
| 8943  | AP3D1    | NA | 1  |
| 89953 | KLC4     | 1  | 1  |
| 90025 | UBE3D    | 1  | 1  |
| 902   | CCNH     | NA | 1  |
| 90427 | BMF      | 1  | NA |
| 90525 | SHF      | 1  | NA |
| 9117  | SEC22C   | 1  | NA |
| 91408 | BTF3L4   | 1  | NA |
| 9141  | PDCD5    | NA | 1  |
| 91452 | ACBD5    | 1  | 1  |
| 91603 | ZNF830   | NA | 1  |
| 91748 | ELMSAN1  | 1  | 1  |
| 91750 | LIN52    | NA | 1  |
| 91775 | NXPE3    | 1  | NA |
| 92345 | NAF1     | 1  | 1  |
| 9249  | DHRS3    | 1  | NA |
| 92521 | SPECC1   | 1  | 1  |
| 928   | CD9      | 1  | NA |
| 9364  | RAB28    | NA | 1  |
| 93974 | ATP5IF1  | 1  | 1  |
| 94015 | TTYH2    | NA | 1  |
| 9423  | NTN1     | 1  | NA |
| 9440  | MED17    | NA | 1  |
| 9443  | MED7     | NA | 1  |
| 9538  | EI24     | 1  | NA |
| 9570  | GOSR2    | 1  | NA |
| 9578  | CDC42BPB | 1  | NA |
| 9592  | IER2     | 1  | 1  |
| 960   | CD44     | 1  | NA |
| 9644  | SH3PXD2A | 1  | NA |
| 9692  | KIAA0391 | 1  | NA |
| 9703  | KIAA0100 | 1  | 1  |
| 9718  | ECE2     | 1  | NA |
| 9747  | TCAF1    | 1  | 1  |
| 9752  | PCDHA9   | 1  | NA |
| 9759  | HDAC4    | 1  | 1  |
| 9761  | MLEC     | 1  | NA |
| 9913  | SUPT7L   | 1  | 1  |

|      |      |    |    |
|------|------|----|----|
| 9924 | PAN2 | 1  | NA |
| 9941 | EXOG | 1  | 1  |
| 9986 | RCE1 | NA | 1  |

---

**Supplemental Table 4. Overlap of MD related DMPs and DMRs with PGC GWAS loci.**

| <b>Chromosome</b> | <b>DNA.m.start</b> | <b>DNA.m.end</b> | <b>PGC.start</b> | <b>PGC.end</b> |
|-------------------|--------------------|------------------|------------------|----------------|
| chr6              | 29521506           | 29521506         | 27738000         | 32848000       |
| chr6              | 30031455           | 30031455         | 27738000         | 32848000       |
| chr6              | 30519905           | 30521619         | 27738000         | 32848000       |
| chr6              | 31828260           | 31830030         | 27738000         | 32848000       |
| chr6              | 32797253           | 32798887         | 27738000         | 32848000       |
| chr10             | 106401479          | 106401479        | 106397000        | 106904000      |

**Supplemental Table 5. Overlap of MD related VMPs and VMRs with PGC GWAS loci.**

| <b>Chromosome</b> | <b>DNA.m.start</b> | <b>DNA.m.end</b> | <b>PGC.start</b> | <b>PGC.end</b> |
|-------------------|--------------------|------------------|------------------|----------------|
| chr2              | 58265673           | 58265673         | 57765000         | 58485000       |
| chr5              | 164658718          | 164658718        | 164440000        | 164789000      |
| chr6              | 28706472           | 28706472         | 27738000         | 32848000       |
| chr6              | 28890673           | 28890673         | 27738000         | 32848000       |
| chr6              | 31324972           | 31324972         | 27738000         | 32848000       |
| chr6              | 31707922           | 31707922         | 27738000         | 32848000       |
| chr6              | 31802397           | 31802397         | 27738000         | 32848000       |
| chr6              | 32049516           | 32049825         | 27738000         | 32848000       |
| chr6              | 32055738           | 32055738         | 27738000         | 32848000       |
| chr6              | 32789916           | 32789916         | 27738000         | 32848000       |
| chr6              | 32818212           | 32818212         | 27738000         | 32848000       |
| chr6              | 32847830           | 32847830         | 27738000         | 32848000       |
